# Supplementary material for: Gold(III)-Catalyzed Propargylic Substitution Reaction Followed by Cycloisomerization for Synthesis of Poly-Substituted Furans from N-Tosylpropargyl Amines with 1,3-Dicarbonyl Compounds
Source: MDPI journal article supplement (doi:10.3390/molecules29020378), 2024-01-11
Supplement: s1 [file s1]

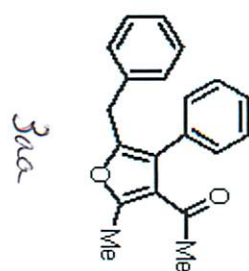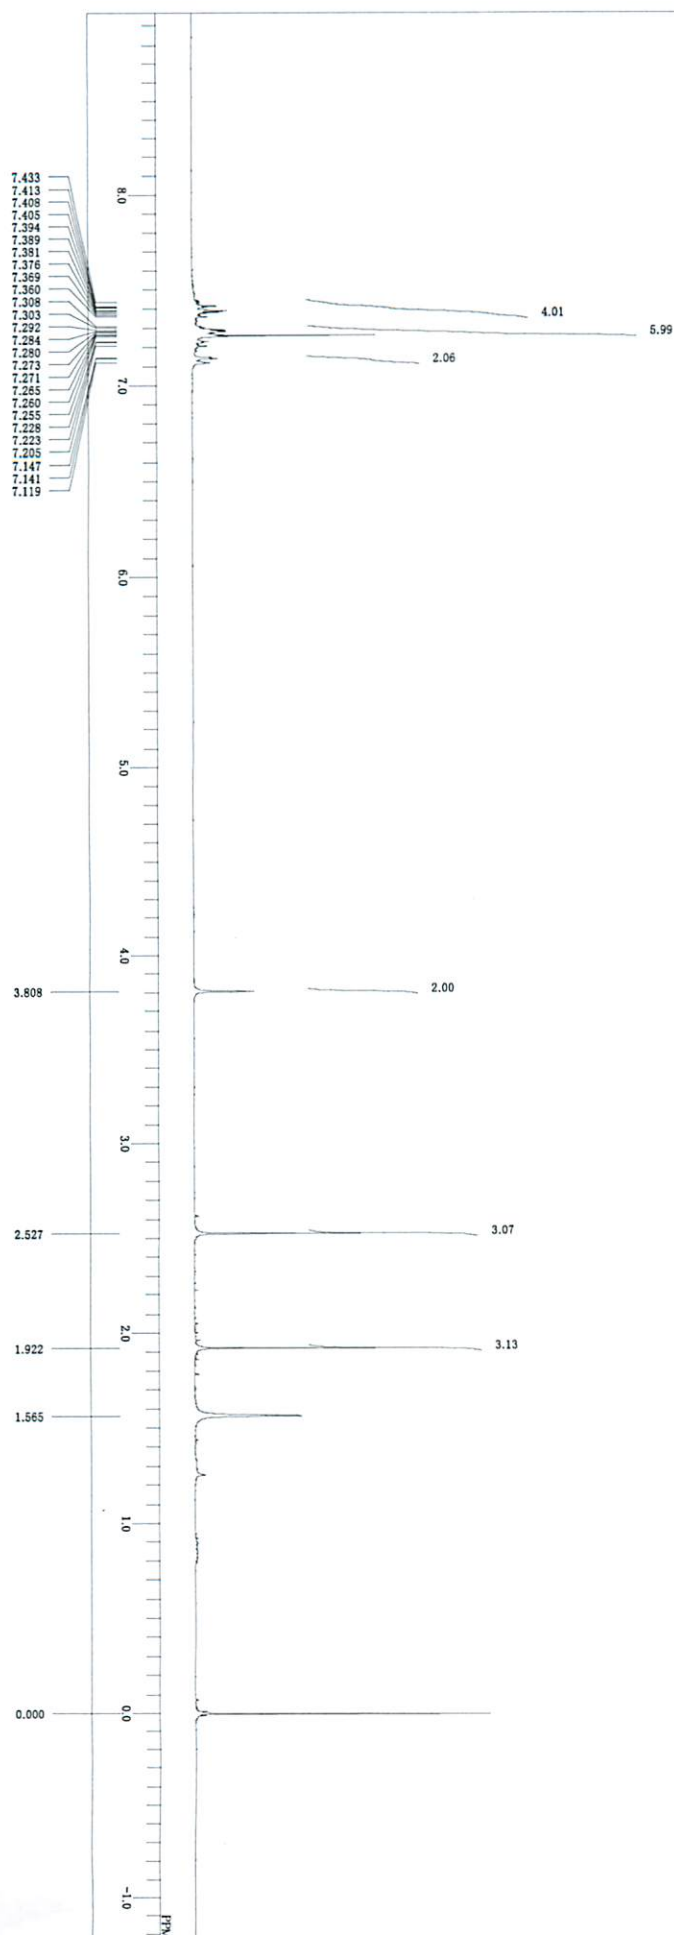

FILE 20161011 NO72INON.EI.4s  
 COUNT 20161011 NO72  
 DATE 2016 Oct 11 16:17:44 2016  
 NAME III  
 METHOD EXMOD  
 INSTRUMENT 300.40 MHz  
 OBSERVATION 150.00 MHz  
 POINT 16384  
 FREQ 600.01 Hz  
 SCANS 8  
 AVERAGING 2.2779 sec  
 PD 4.2720 sec  
 PULPROG 6.00 usec  
 INSTRUM III  
 CHANNEL 22.1 e  
 CPM 0.00 ppm  
 EXREF 0.12 Hz  
 BF 22  
 RGAIN

302

[illegible]

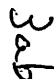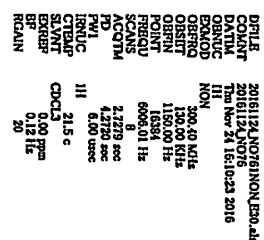

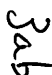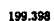

| DETAILS | 20181025,NOT1BICM,B55 |
|---------|-----------------------|
| COMANT  | 20181025              |
| DRINK   | 13C                   |
| EXAMOD  | Oct 25 15:09:12 2016  |
| OFFREQ  | BCM                   |
| ORIENT  | 74.48 MHz             |
| POINT   | 1544.00 Hz            |
| POINT   | 33769                 |
| PREBU   | 201810,23 1h          |
| ACQSTA  | 201810,23 1h          |
| PD      | 1,5000 sec            |
| PRC     | 1,5000 sec            |
| PRC     | 1,5000 sec            |
| PRC     | 5,10 usec             |
| PRC     | III                   |
| PRC     | 20,4 c                |
| SLAVNT  | CD13                  |
| DEBEP   | 77.00 ppm             |
| BP      | 0,12 Hz               |
| RCLOC   | 25                    |

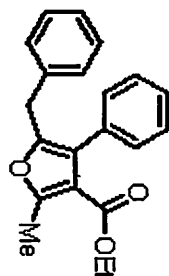

3ac

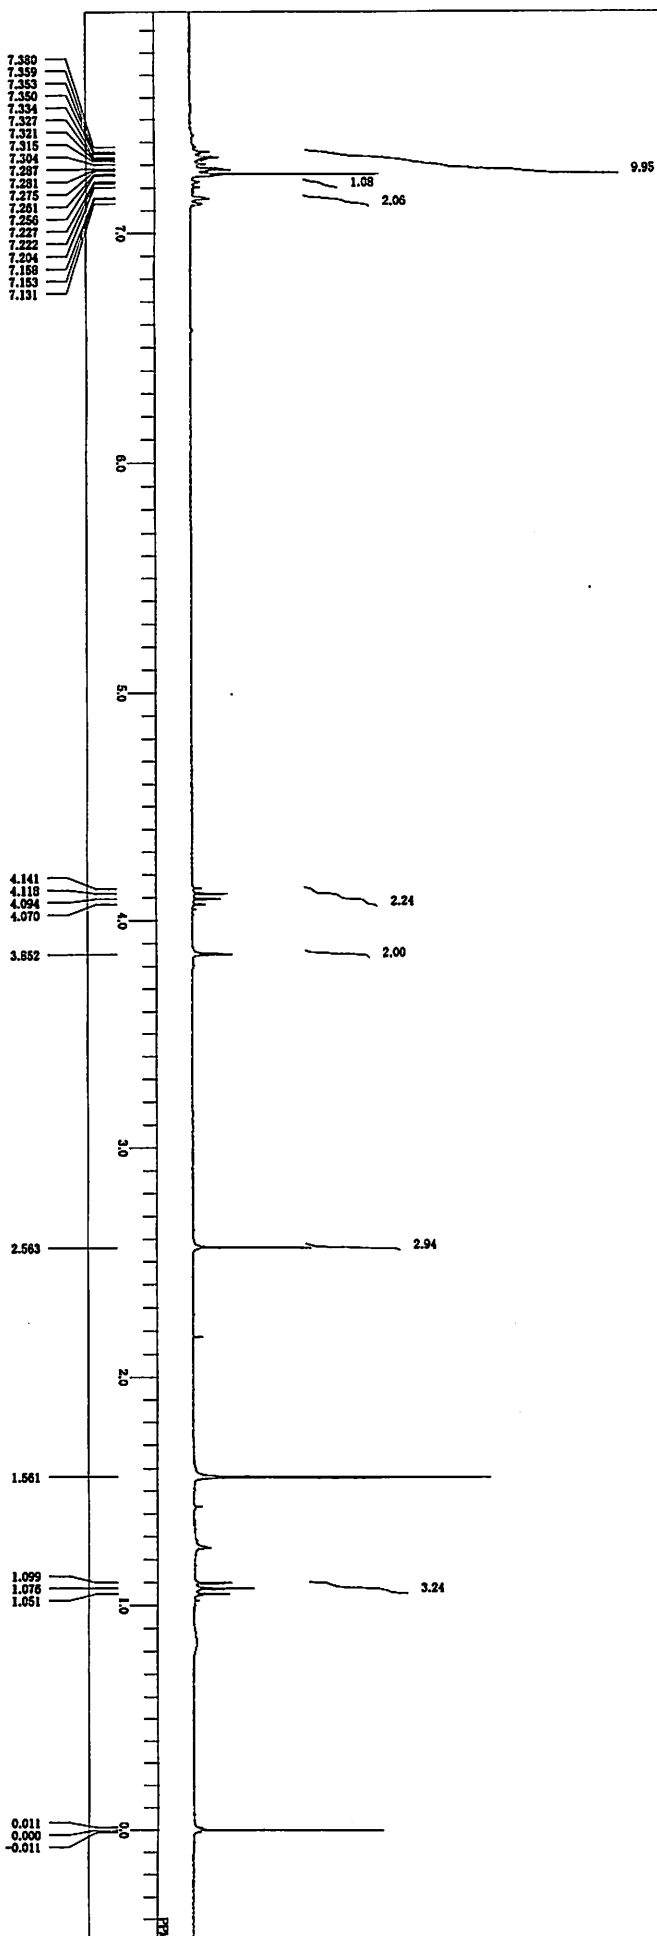

DETLE 20161129\_NOS7.NON.D26.41  
 COUNT 20161129\_NOS7  
 DATE Thu Nov 29 14:12:28 2016  
 10  
 EXNO 1  
 ORFNO 300.40 MHz  
 ORFRT 130.00 Hz  
 ORIN 1180.00 Hz  
 ORNT 1180.00 Hz  
 PRSQ 6006.01 Hz  
 SCANS 8  
 ACQTM 2.1779 sec  
 PUL 4.000 sec  
 IRNUC 1H  
 CTBAP 20.1 c  
 STNNT CDCl3  
 SNUBP 0.12 Hz  
 BRNIN 23

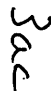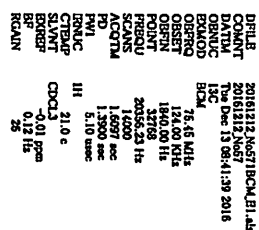

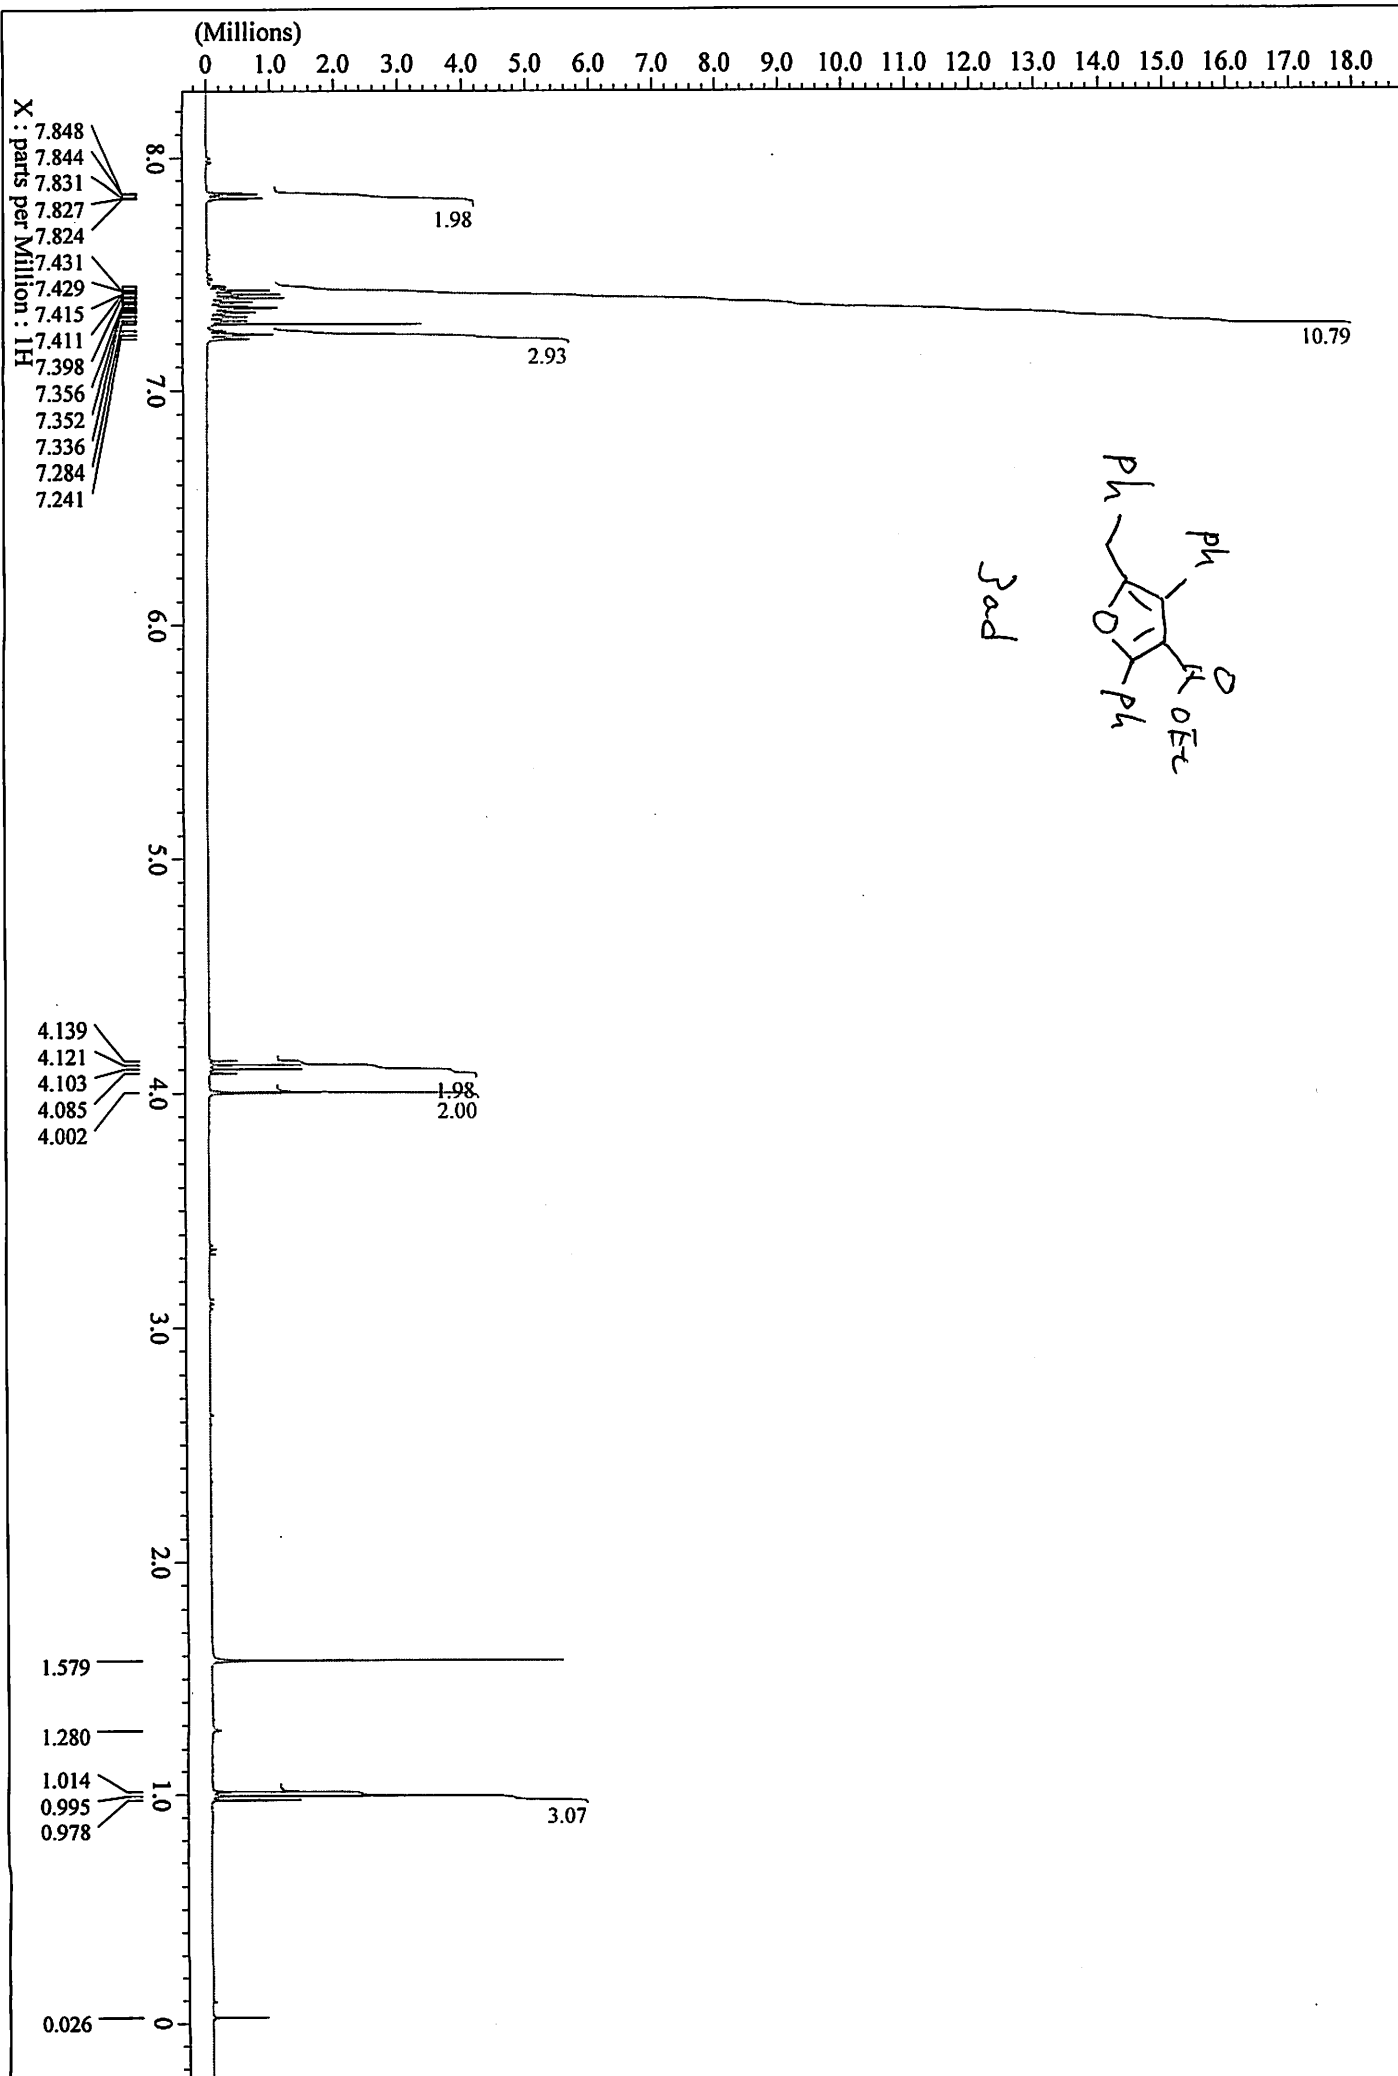

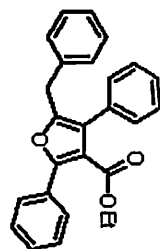

3ad

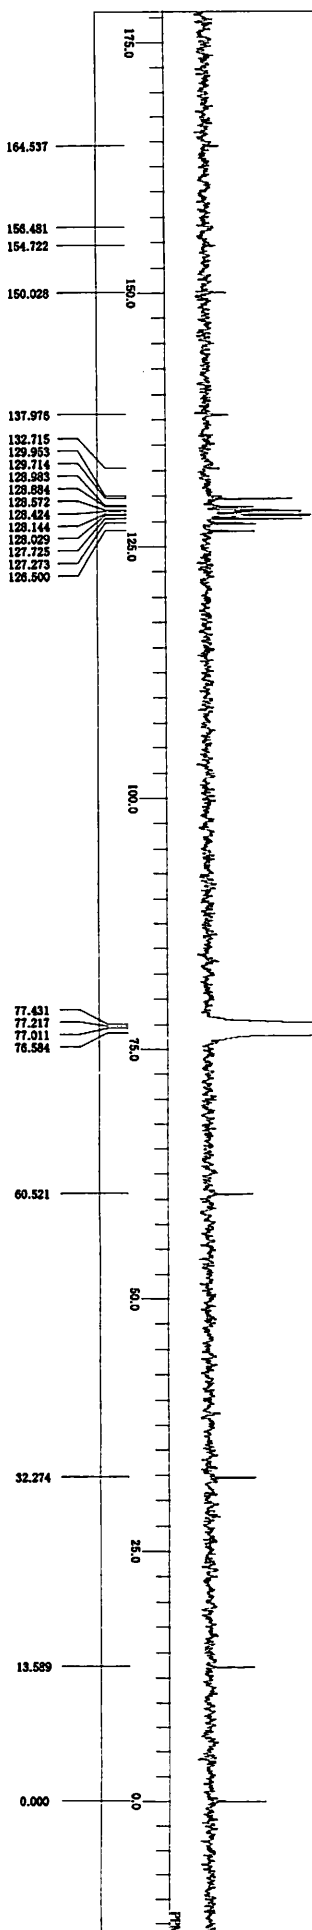

DPFILE 20161217 No78/BCM.E13.ac  
 COMPT 20161217 No78  
 DNAME 13C  
 ORNAM 13C  
 EXMOD BCM  
 OBERQ 76.45 MHz  
 OBERF 164.00 MHz  
 OBERN 164.00 MHz  
 POINT 32768  
 FREQQU 200166.23 Hz  
 SCANS 28800  
 ACQTIME 1.3500 sec  
 PD 5.10 sec  
 PULP 1H  
 CHNAP 20.7 e  
 SNUVT 0.00 ppm  
 BKREF 4.20 Hz  
 RGAIN 28



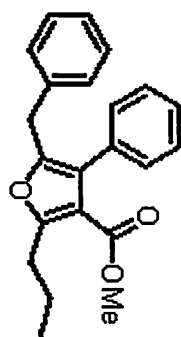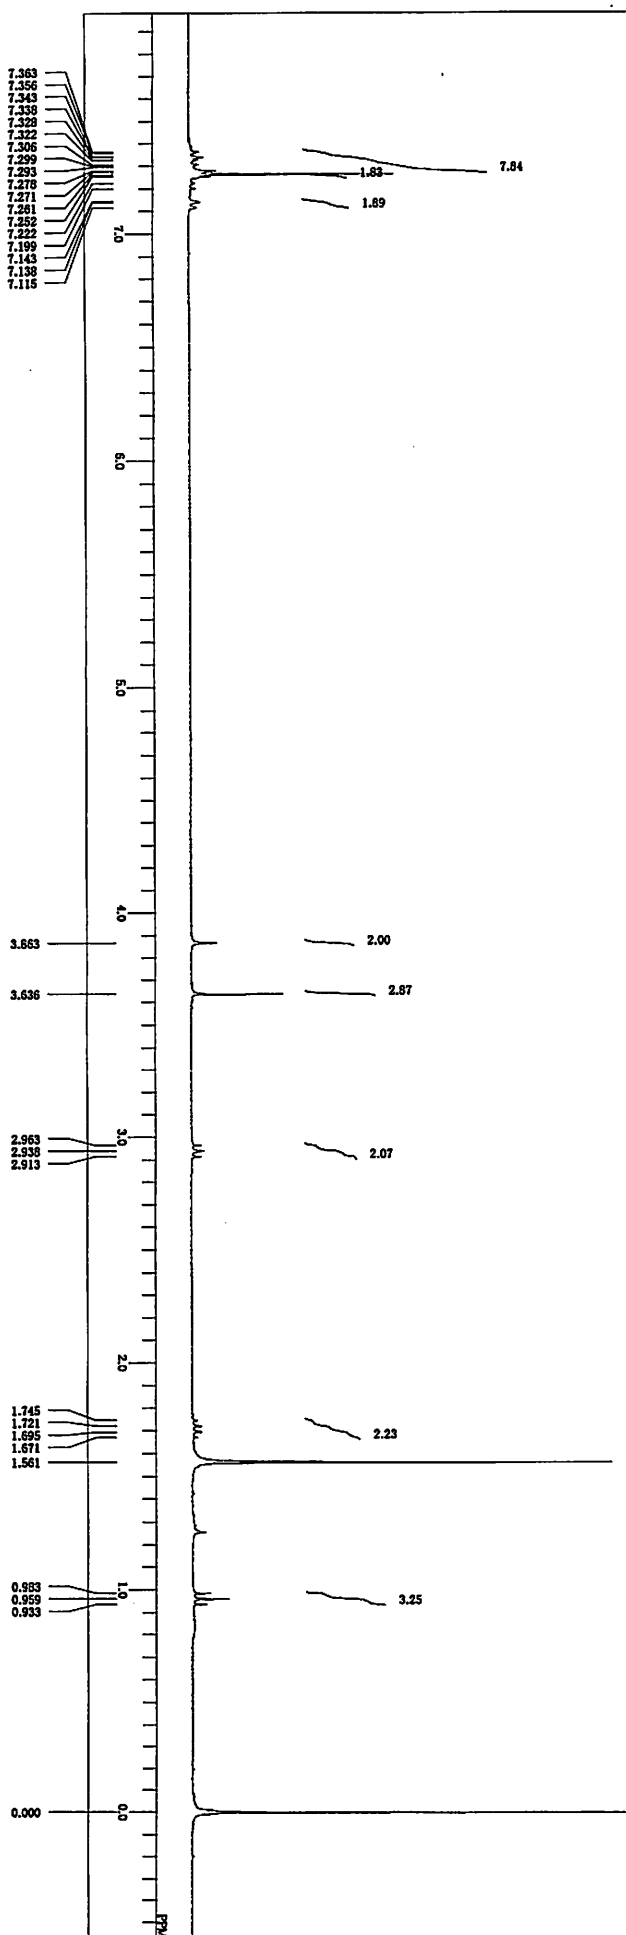

FILE 20161122.N077  
 COUNT 20161122.N077  
 DATE Tue Nov 22 14:13:17 2016  
 NAME NON  
 ORIGIN 300.40 MHz  
 ORIGIN 130.00 MHz  
 ORIGIN 115.00 MHz  
 SCANS 8  
 ACQTIME 2.7779 sec  
 FWHM 4.670 sec  
 INTENS 20.4 c  
 CTBAP CDCl3  
 SOLVENT CDCl3  
 SPPH 0.12 Hz  
 BP 24  
 RCALIB



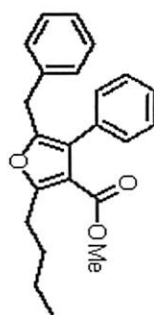

3.05

FILE 20161017.N062\NON.E33.sls  
 COUNT 20161017.N062  
 DATE Mon Oct 17 13:59:00 2016  
 NAME NON  
 INSTR 300.40 MHz  
 PULPROG zgpg30  
 ORIGIN 130.00 KHz  
 F2 150.00 Hz  
 FREQ 600.01 Hz  
 SCANS 8  
 ACQTM 2.7279 sec  
 TD 65536  
 SFO 400.146 MHz  
 IRNUC 1H  
 CTBAP 20.2 c  
 SOLVT CDCl3  
 EXRGPR 0.50 ppm  
 RF 10.12 Hz  
 RCNIN 14

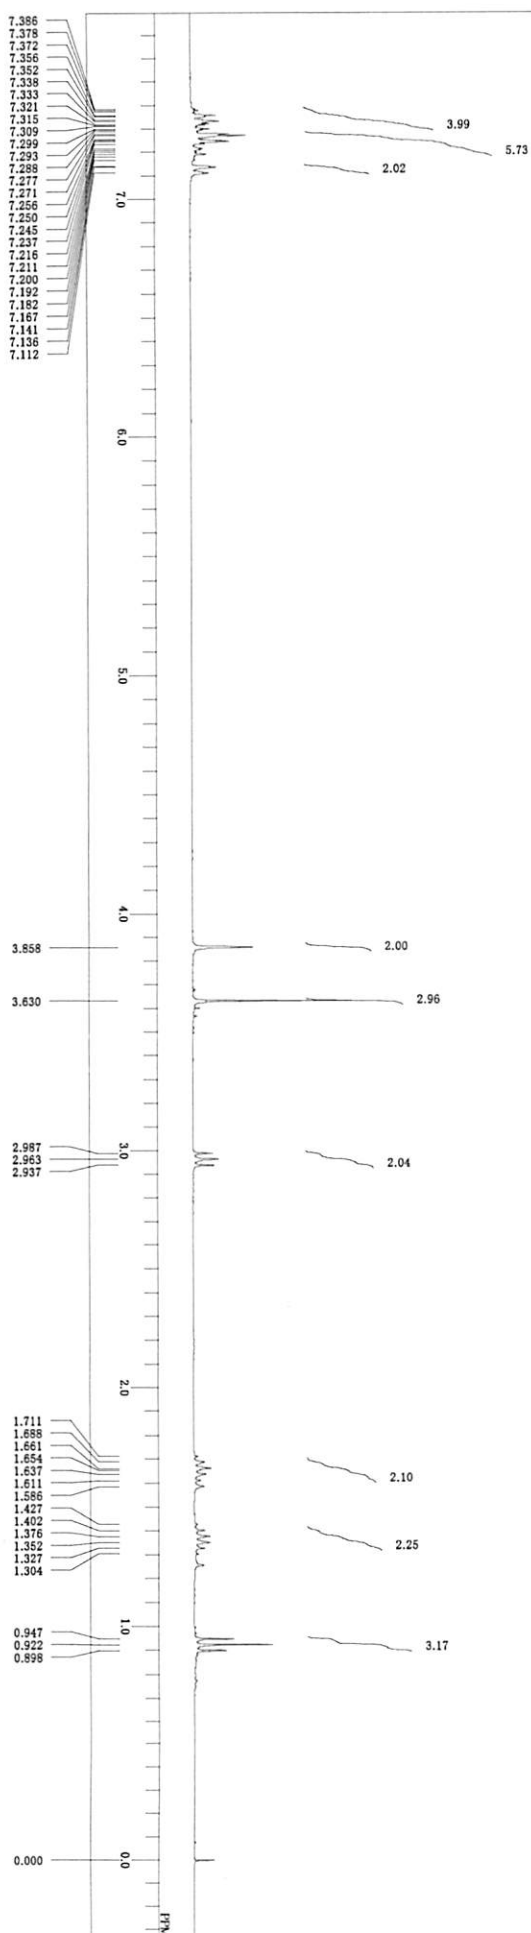

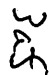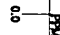

|         |                           |     |
|---------|---------------------------|-----|
| DRILE   | 20111120 M42 BCK          | ESB |
| COMAT   | 20111120 M42              |     |
| DATUM   | The Date 01:08:37:59 2016 |     |
| BRADON  | HC                        |     |
| BRADON  | BCK                       |     |
| ORSHEN  | 71.42 MHz                 |     |
| ORSHEN  | 121.00 MHz                |     |
| POINT   | 184.00 Hz                 |     |
| PREBUZ  | 32768                     |     |
| SCANS   | 201356.23 Hz              |     |
| ACQTIME | 1.6000                    |     |
| PW1     | 1.6000 sec                |     |
| IRBLUC  | 1.6000 sec                |     |
| CTBLAP  | 5.10 usec                 |     |
| SLVANT  | 21.5 c                    |     |
| BRADON  | CD13                      |     |
| IRBLAN  | 77.00 ppm                 |     |
|         | 0.12 Hz                   |     |
|         | 25                        |     |

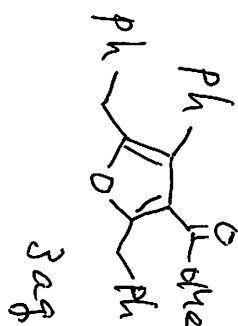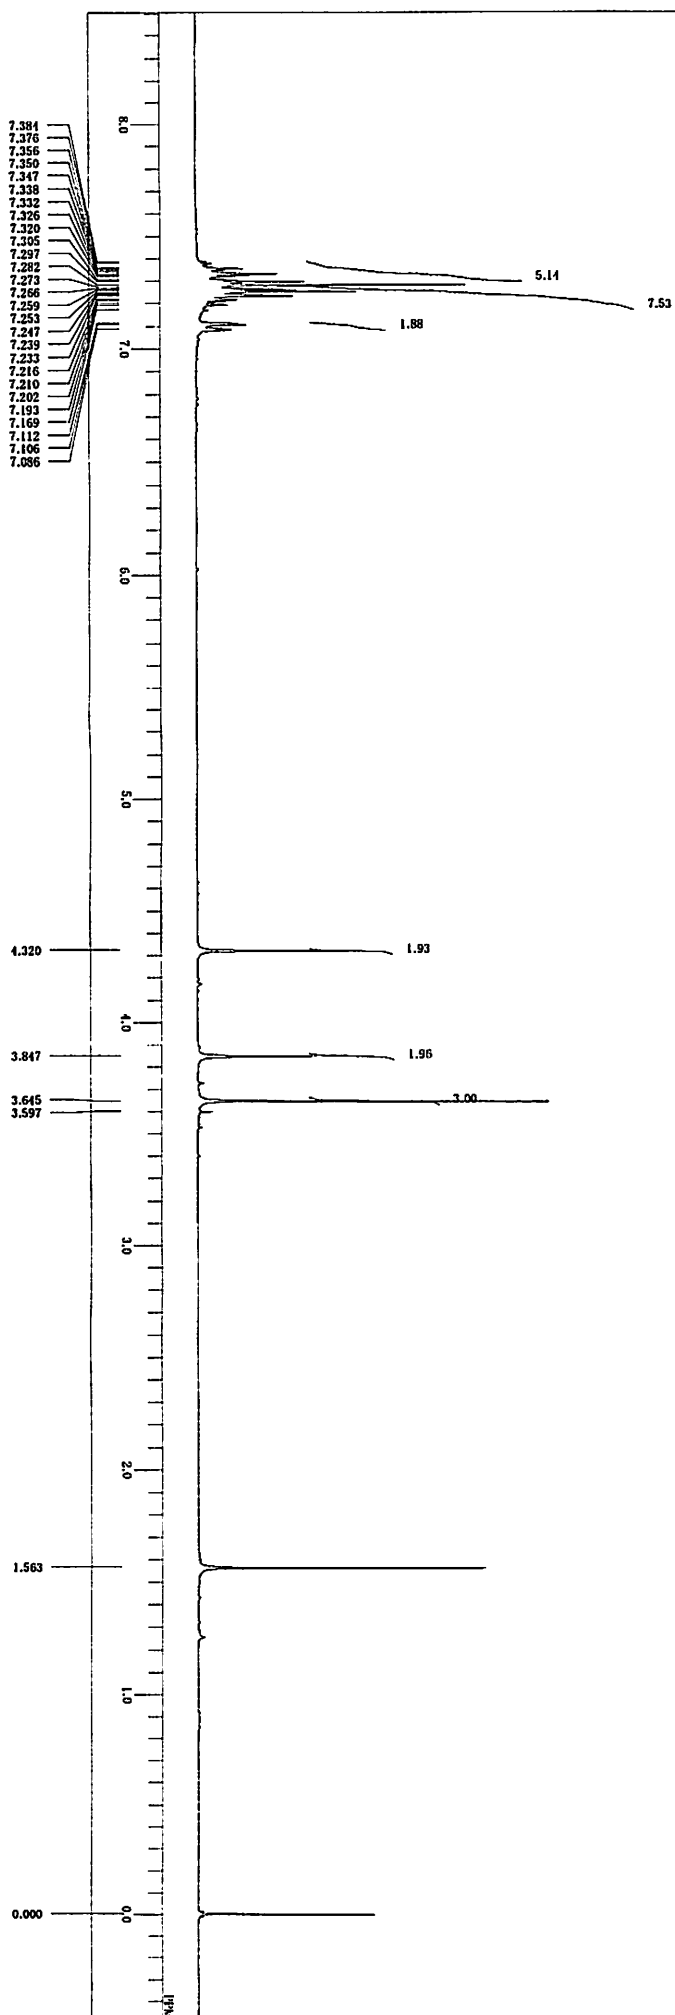

DRILL 20160915\_NO63\_51o7\NON\_H1\_4h  
COUNT 120.00 KHz  
SOLVENT CHCl<sub>3</sub>  
PULSE 16.00 Hz  
PROG 6006.01 Hz  
SCANS 16  
ACQTM 2.4779 sec  
F1 4.4229 sec  
PUL 6.00 sec  
IRNUC III  
CTEMP 21.8 °C  
SOLVENT CHCl<sub>3</sub>  
SOLVENT 120.00 KHz  
RF 0.12 Hz  
RGAIN 19

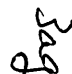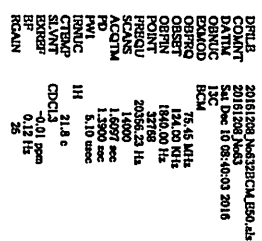

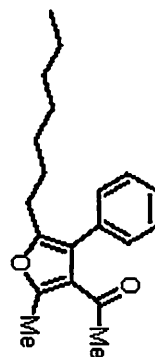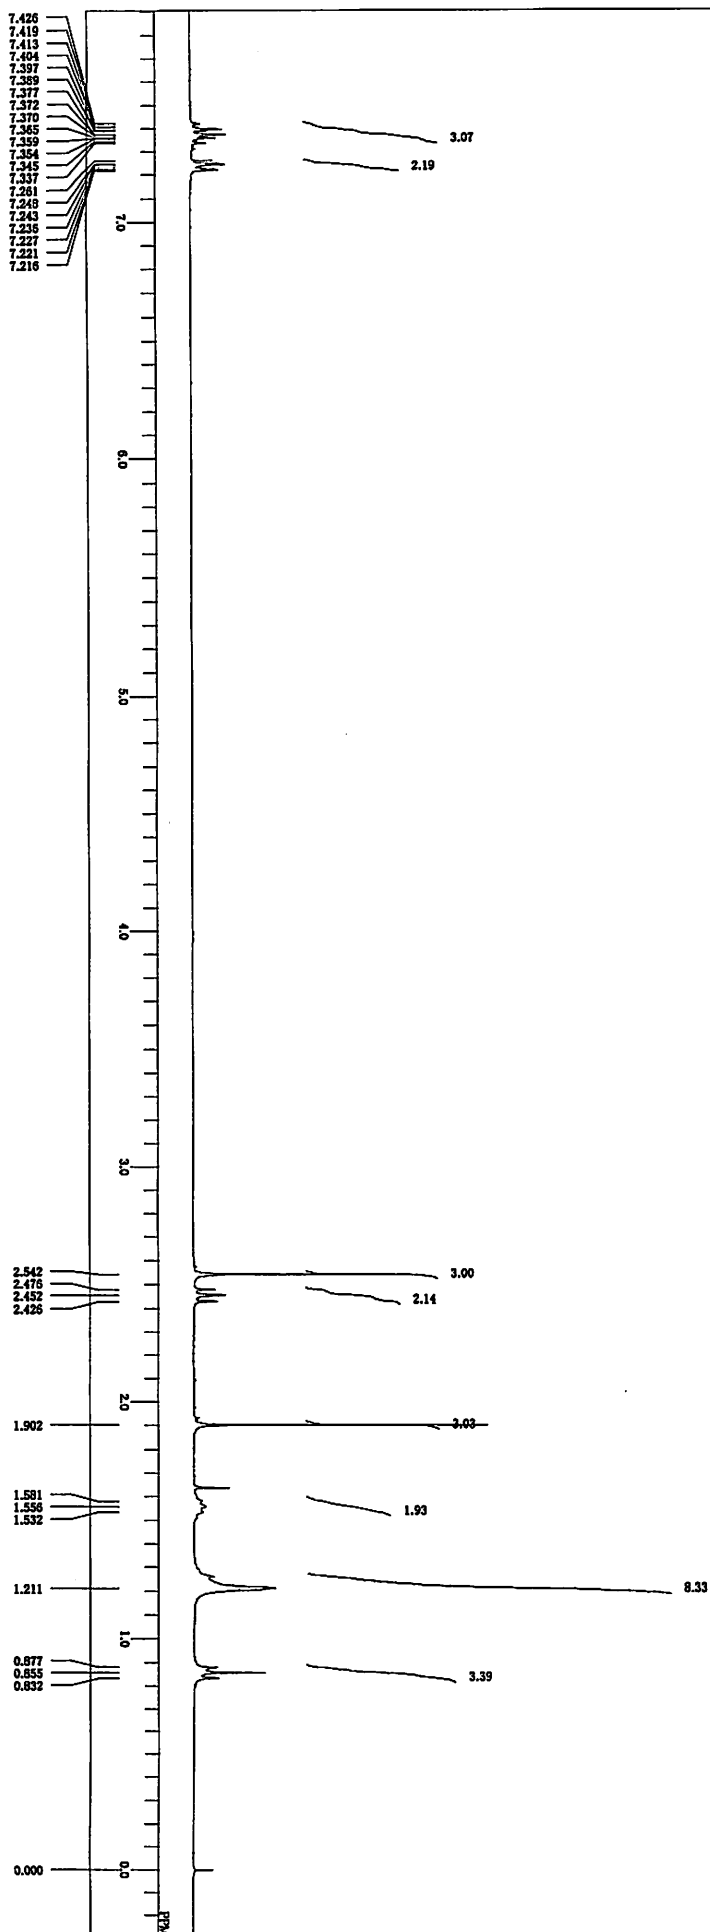

DPHLE 161201NM618NONLBP9.4h  
 COUNT 161201NM618  
 DNAME 161201NM618  
 H1 161201NM618  
 EXMND 300.00 MHz  
 OBSER 13C NMR  
 Q1PRN 1150.00 Hz  
 POINT 16384  
 FREQU 600.01 Hz  
 ACQNM 2.1779 sec  
 PD 4.2720 sec  
 FWH 5.00 usoc  
 INUC 31.5 e  
 CDCL3 0.00 ppm  
 EXREF 0.12 Hz  
 RNAME 15

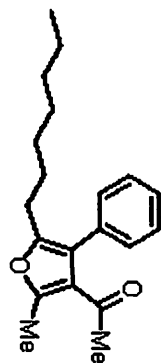

3ba

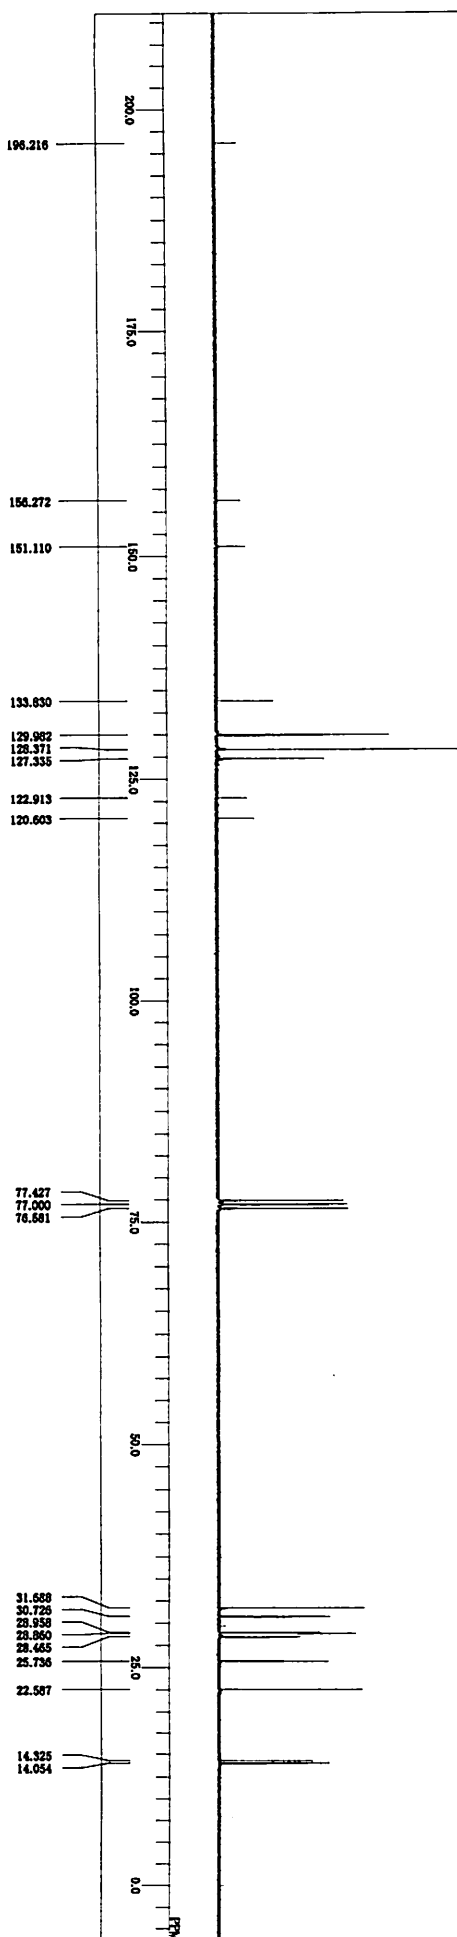

DFILE 161201NM5181DC1.B7, 41  
 COUNT 161201NM518  
 DATE 16 Dec 02 01:05:15 2016  
 NAME 161201NM518  
 PROG 161201NM518  
 INSTR 161201NM518  
 ORIGIN 161201NM518  
 ORFREQ 124.00 MHz  
 ORFREQ 124.00 MHz  
 FREQ 124.00 MHz  
 SCANS 6000  
 ACQTIME 1.0097 sec  
 F2 124.00 MHz  
 F1 124.00 MHz  
 IONIC CTBAP 20.9 e  
 SOLVENT CDCl3 77.00 ppm  
 BRIDGE 161201NM518  
 RGAUN 25



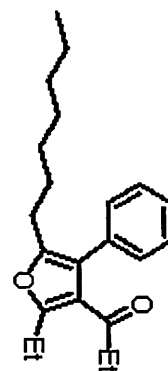

366

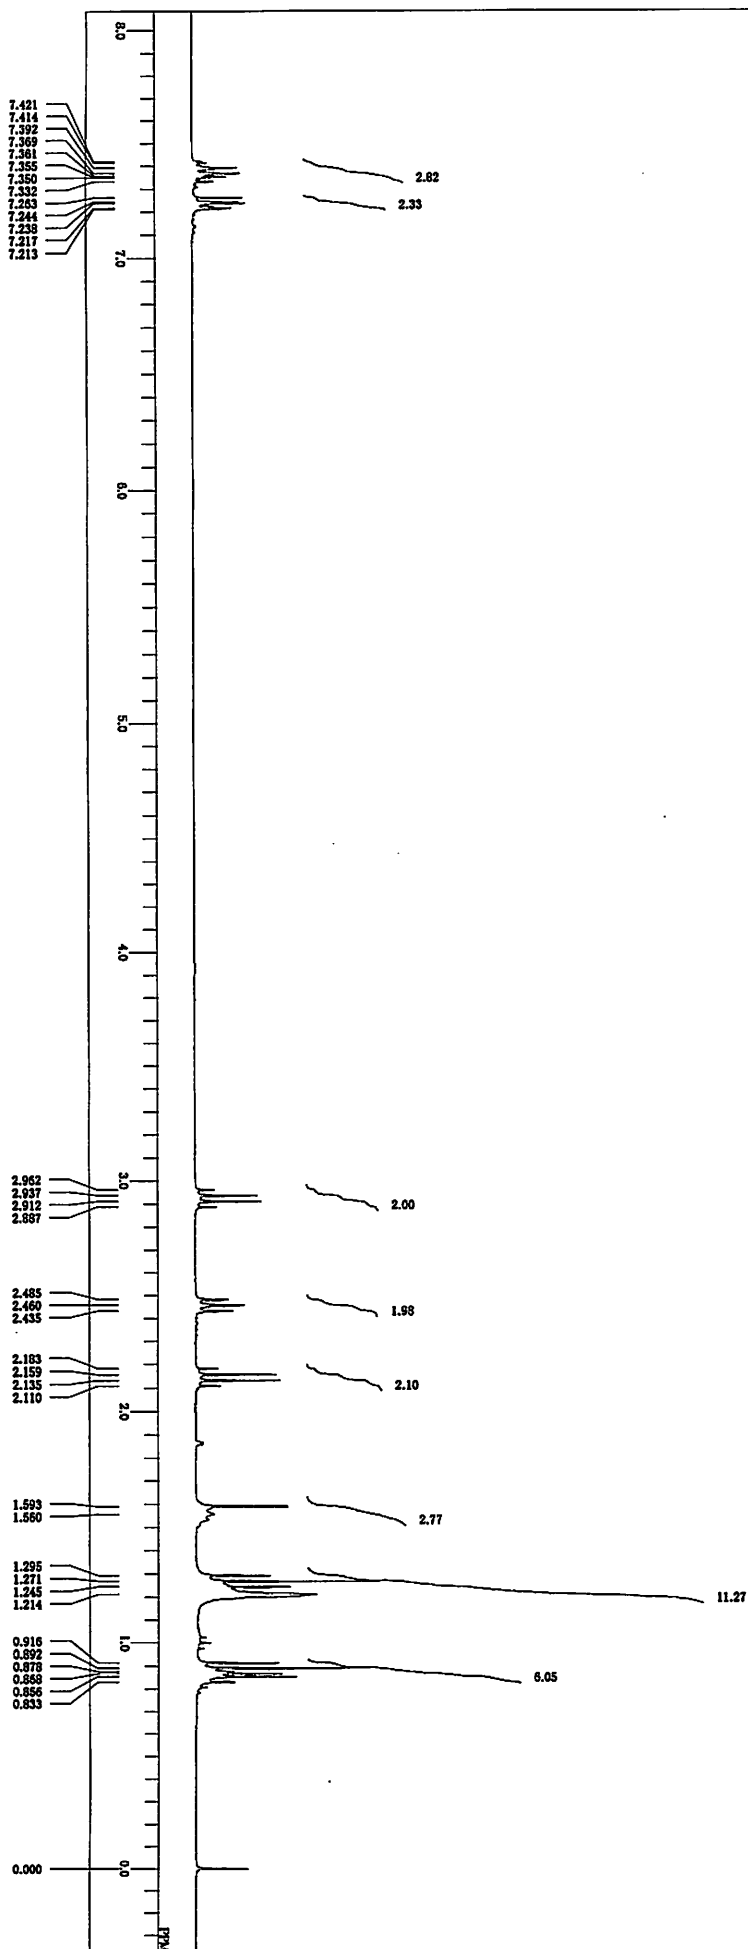

DPFILE 151206NN/520\_rev.1 NON.BIT.4b  
 COUNT 151206NN/520\_rev.1  
 DATE 7/20/2016  
 TIME 15:55:50  
 INSTR 300.0 MHz  
 PULPROG zgpg30  
 PCYCL 1  
 F2 300.0 MHz  
 F1 119.91 Hz  
 POINT 15384  
 SCANS 6000.0 Hz  
 SFO 300.0 MHz  
 PD 2.779 sec  
 P2 4.2720 sec  
 P3 6.00 sec  
 FWH 20.5 c  
 INSTRUMENT CPMG  
 SOLVENT CDCl3  
 EXPT 0.00 ppm  
 BP 0.12 Hz  
 RGAIN 16



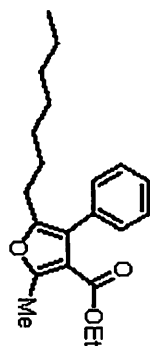

3b

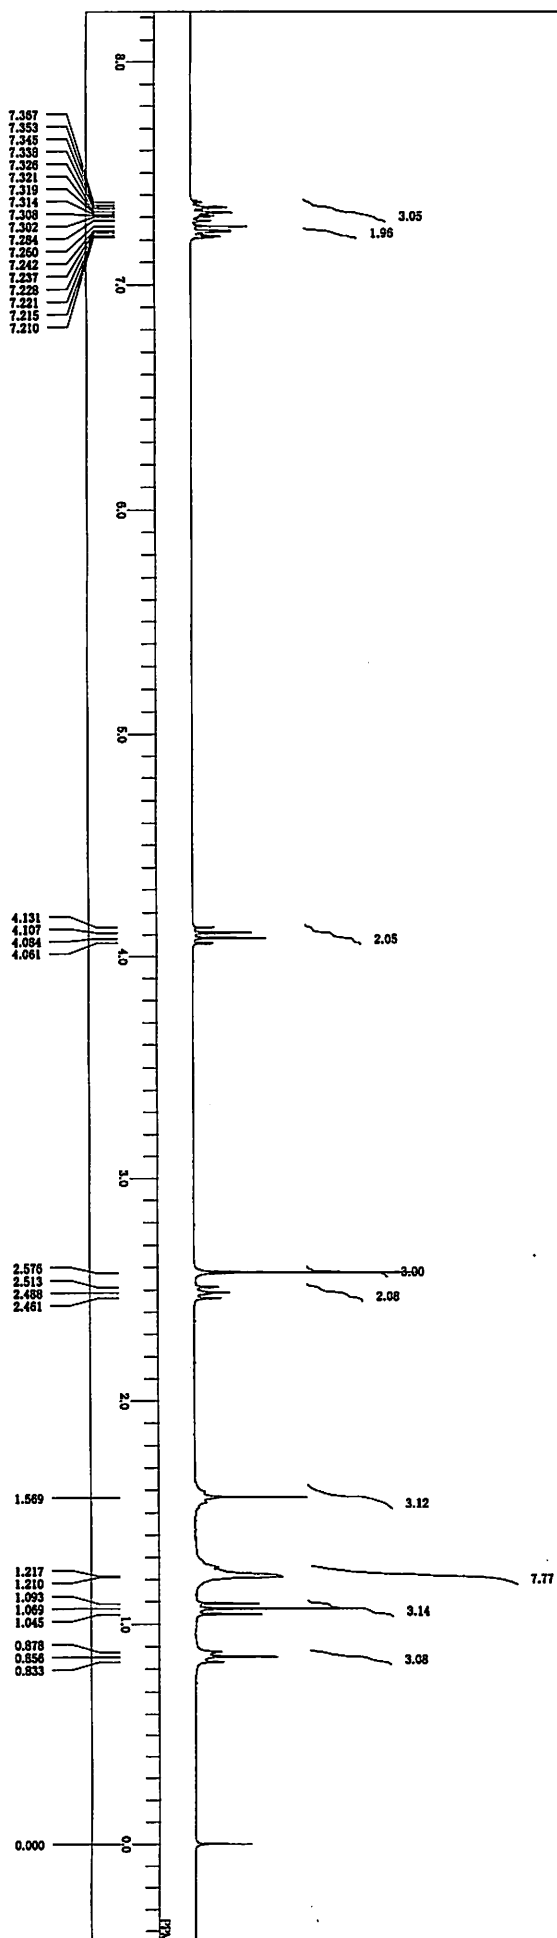

FILE 161203NM52\_1\\NON.EI14.45  
 COUNT 161203NM52\_1  
 DATE 31 Dec 03 16:55:50 2016  
 INSTR 400 MHz  
 EXMOD 1H  
 OFFSET 120.00 kHz  
 C1H13C 150.00 Hz  
 POINT 16384 Hz  
 PREQU 6006.01 Hz  
 SCANS 8  
 ACQTIME 2.7779 sec  
 F2 4.7279 sec  
 FWH 6.00 sec  
 INTRUC 11  
 CTDPG 20.4 e  
 SCALED CDCl3 50.0 ppm  
 SUBST 0.12 Hz  
 BR 17  
 RCALIB 17

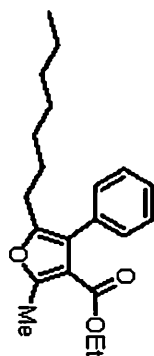

3b

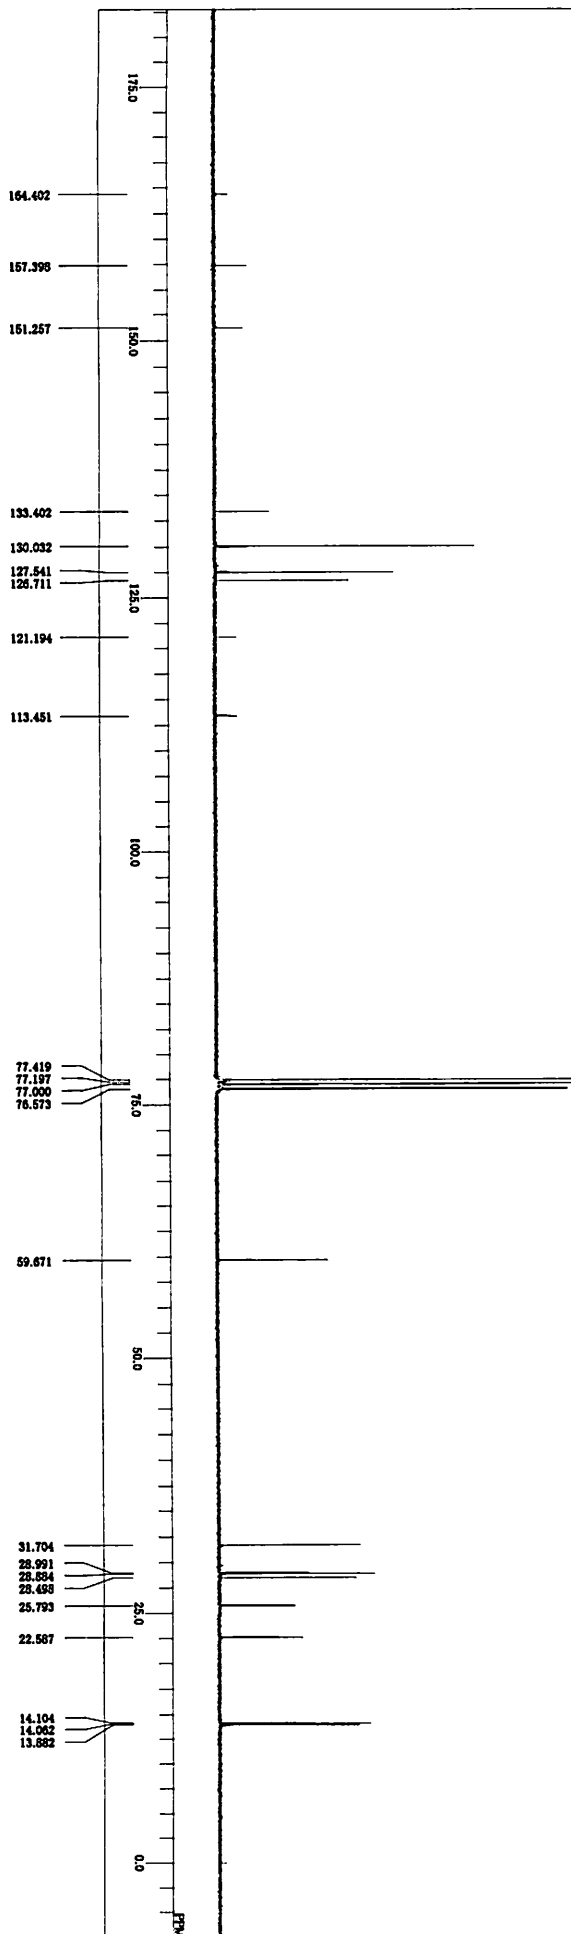

FILE 161203NM621.1BCKL8137.d6  
 COUNT 161203NM621.1  
 DATE 08 Dec 04 08:31:55 2016  
 NAME 3b  
 SOLVENT CDCl<sub>3</sub>  
 PPM 76.45 MHz  
 OBSERVE OBSERVE  
 OBSERVE 124.00 Hz  
 OBSERVE 160.00 Hz  
 FREQ 200.5623 Hz  
 SCANS 14000  
 ACQTIME 1.0000 sec  
 FID 1.0000 sec  
 FWHM 0.10 sec  
 RMSC 20.8 c  
 CTBAP 1.00 ppm  
 SCAVP 0.12 Hz  
 BR 25  
 RCALIN 25

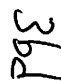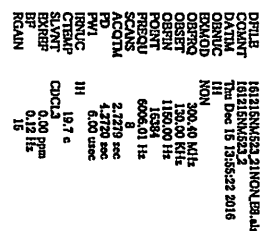

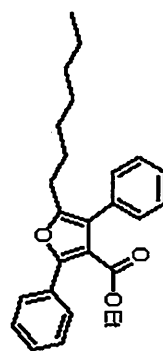

Page

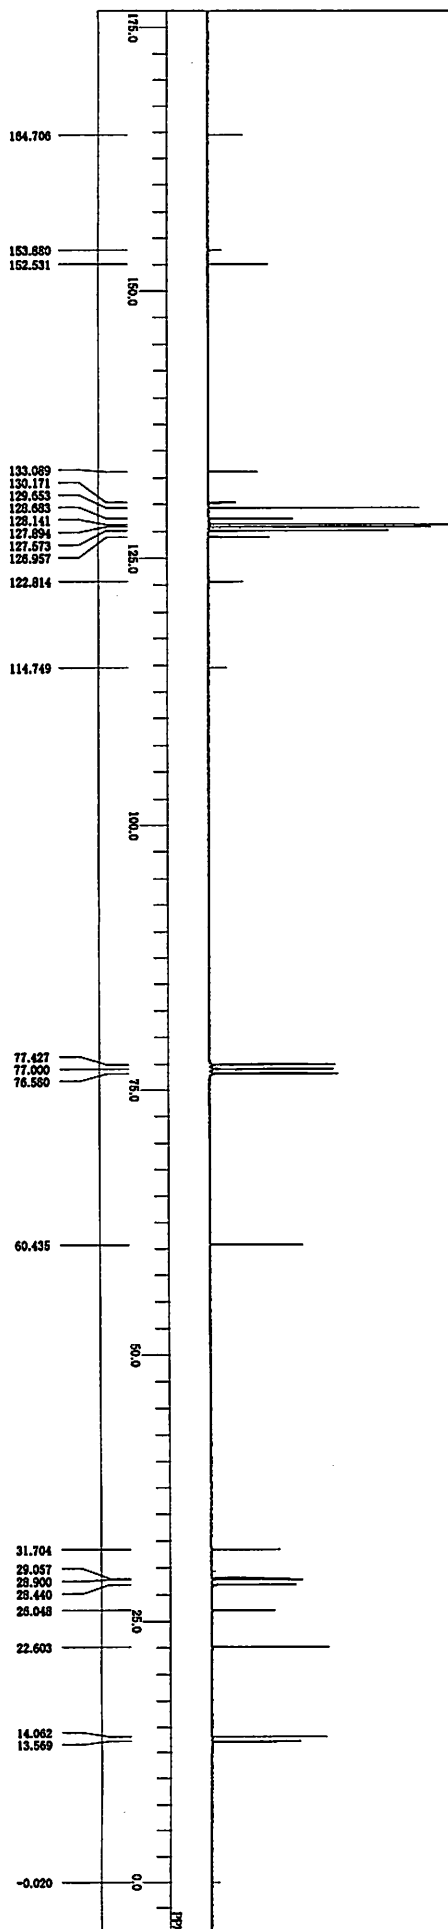[illegible]

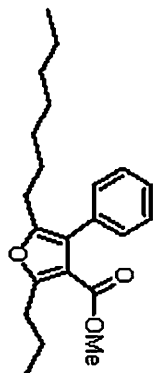

3be

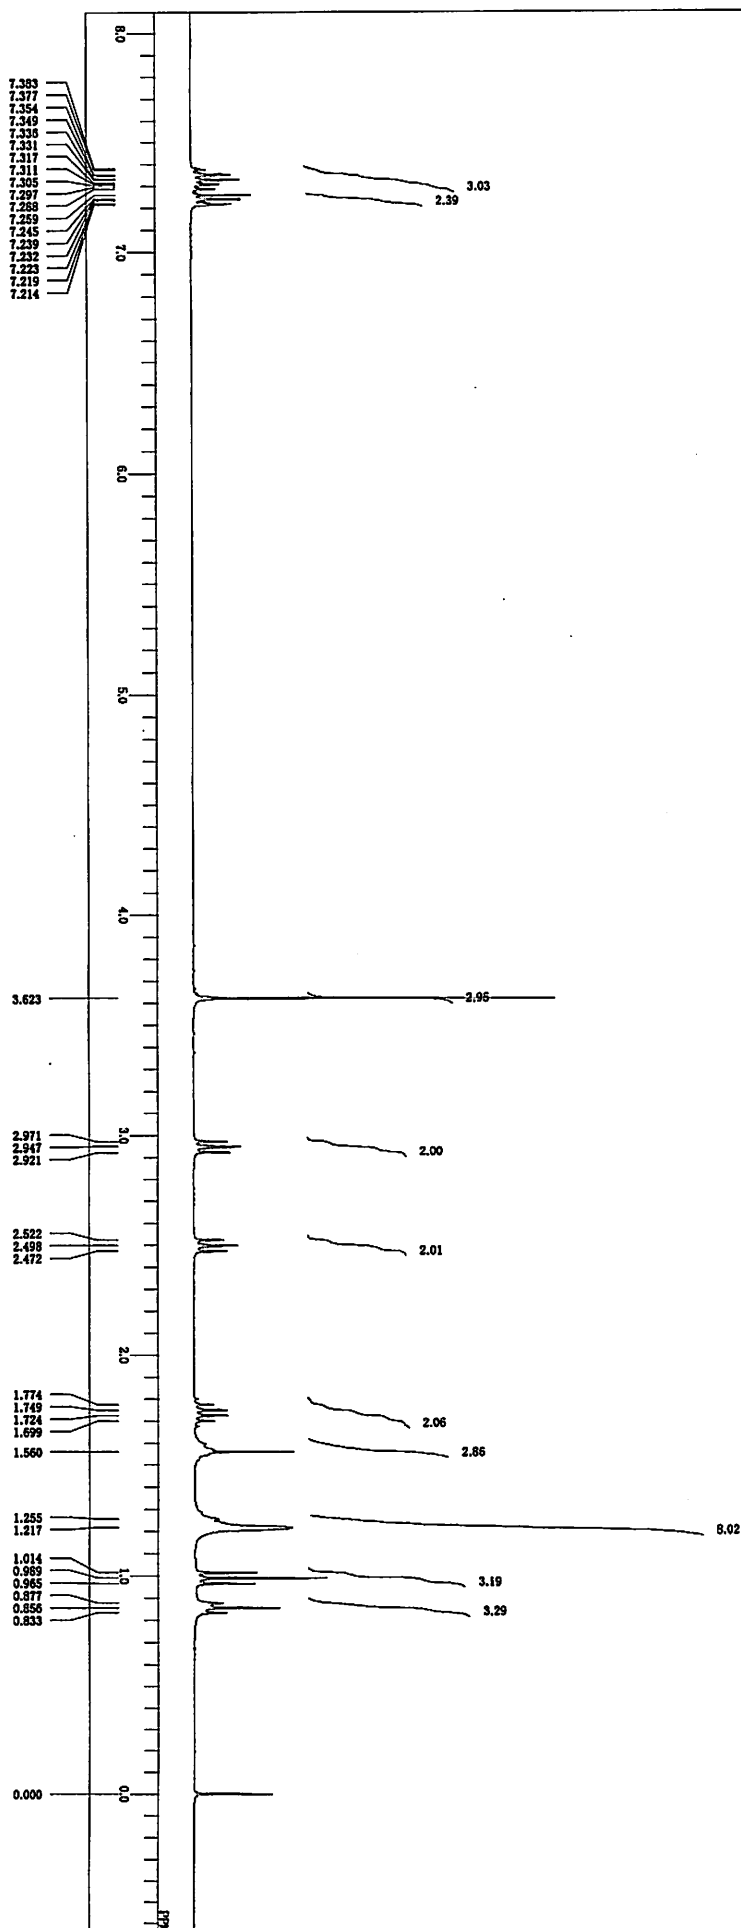

DPFILE 161217NM524.1\NON.EI.44  
 COUNT 572  
 DNAME 11/19/2016 10:28:21 AM  
 ELEMED 300.13 MHz  
 FREQ 118.00 MHz  
 POINT 15384  
 PRECU 6006.01 Hz  
 ACQNS 2.179 sec  
 PD 4.272 sec  
 PULP 6.00 sec  
 INTRUC 3H  
 STWAT 21.7 e  
 EXREF CDCl3  
 BP 0.00 ppm  
 RGAIN 0.12 Hz  
 IT 17

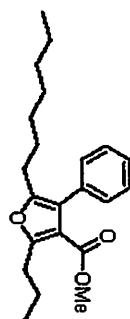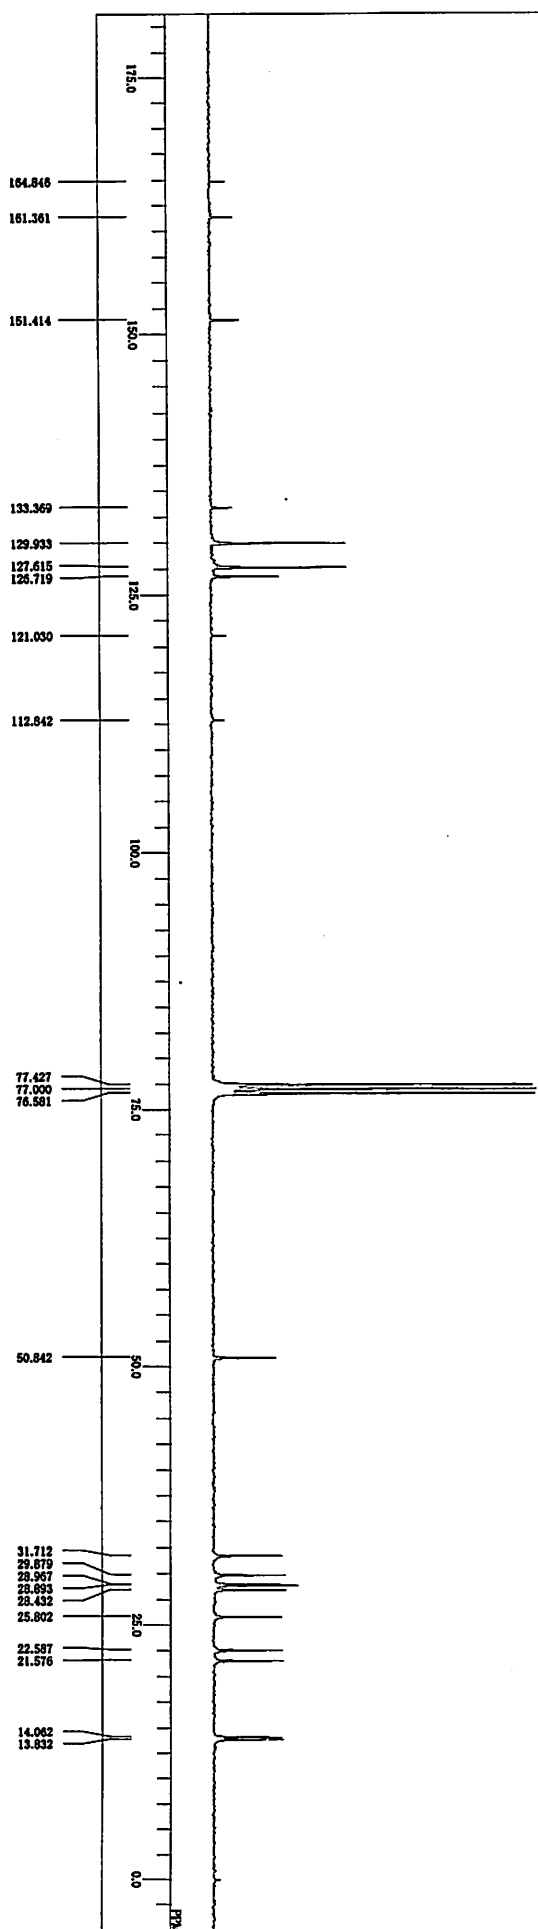

DFILE 161217NM524.1\BCM.B12.41  
 COUNT 3  
 ORIGIN 311  
 EXAMOD 1H Dec 18 08:37:45 2016  
 ORIENT 0  
 OBSERV 164.00 MHz  
 POINT 32759 Hz  
 PRESQU 20036.23 Hz  
 SCANS 14000  
 PCNTM 1.5000 sec  
 P 1.5000 sec  
 PW 5.10 usec  
 IRNUC 1H  
 GTSAP 20.5 e  
 CHCL3 77.00 ppm  
 EXREF 32759  
 BP 4.20 Hz  
 RGAIN 25



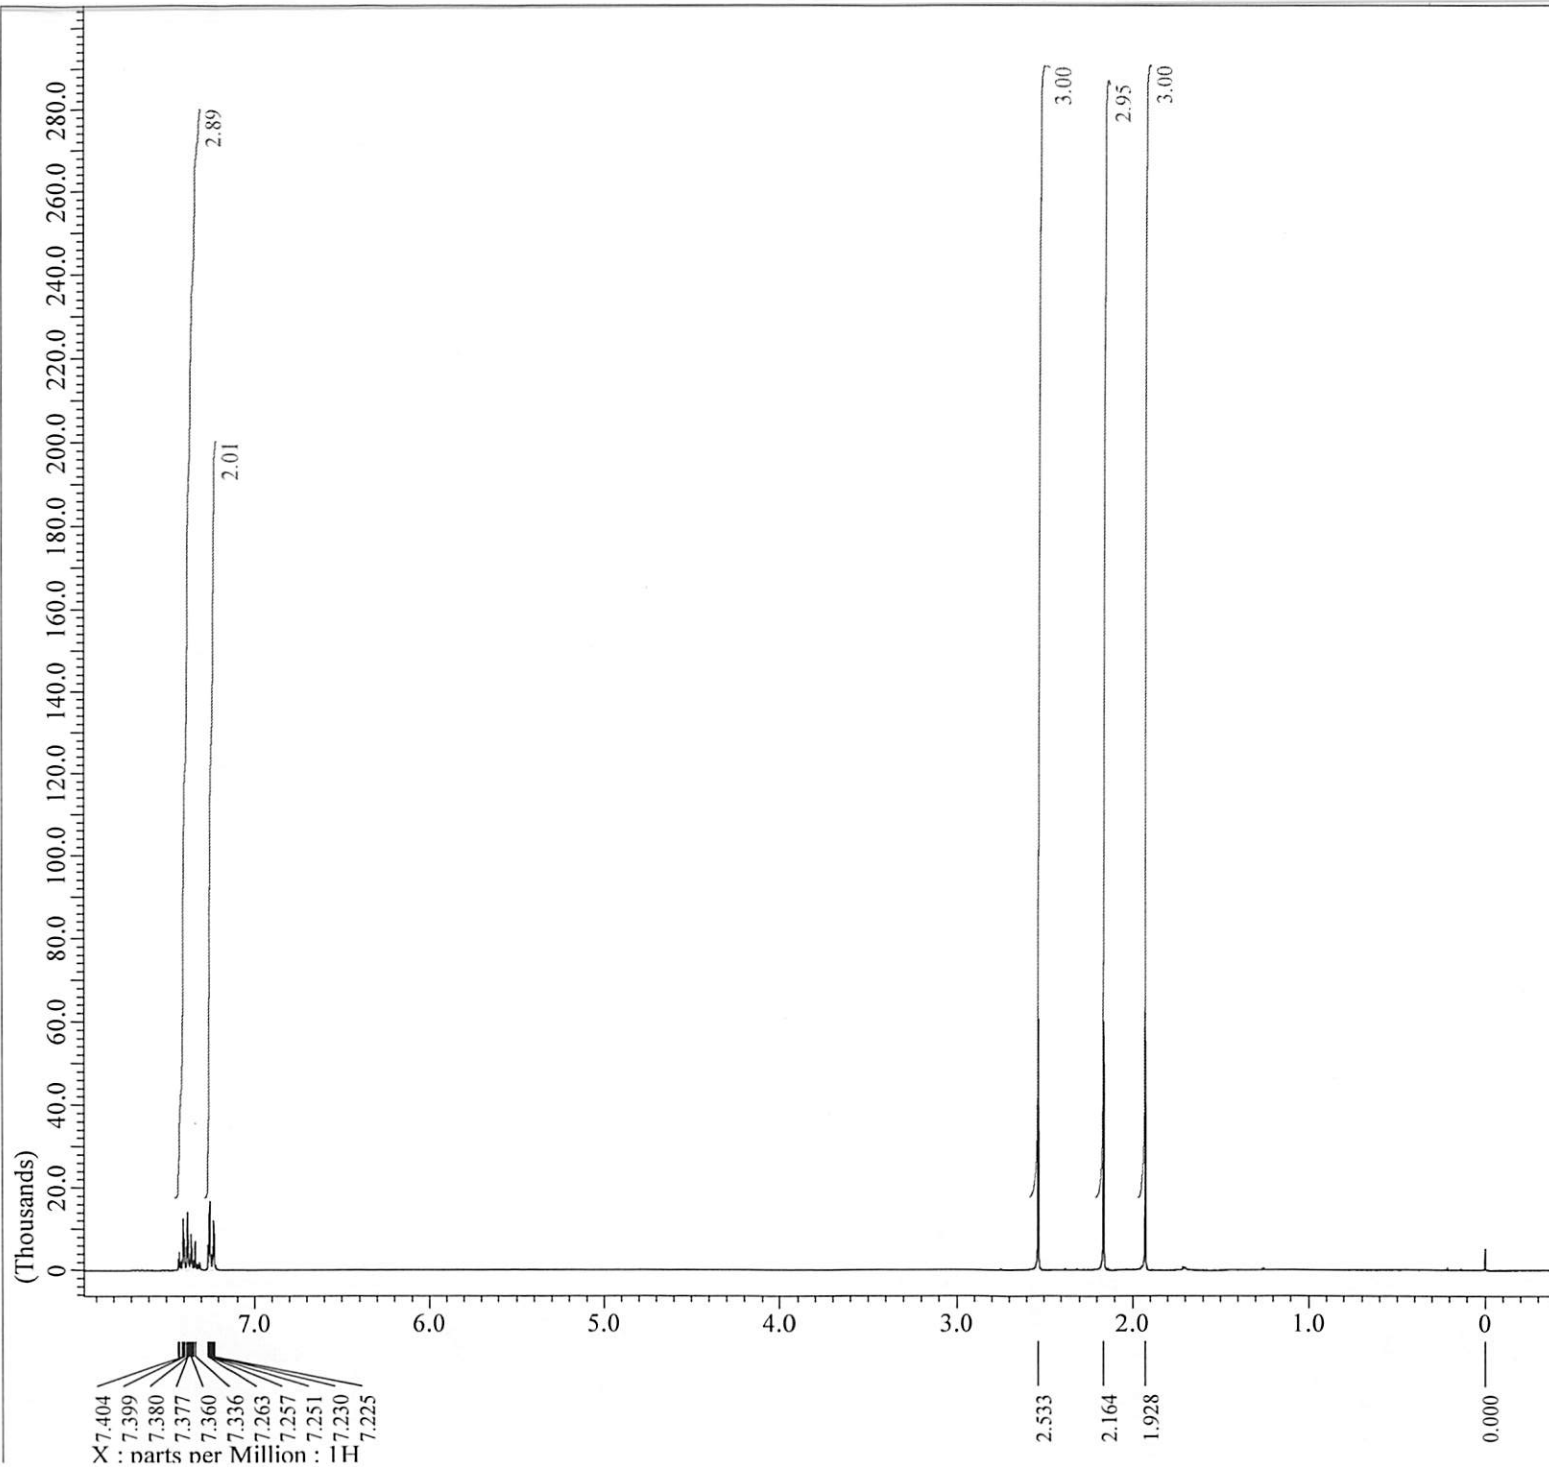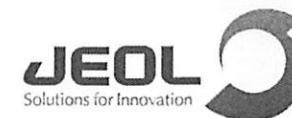

---- PROCESSING PARAMETERS ----  
 dc\_balance( 0, FALSE )  
 secp( 0.2[Hz], 0.0[s] )  
 trapezoid( 0[%], 0[%], 80[%], 100[%] )  
 zerofill( 1 )  
 fft( 1, TRUE, TRUE )  
 machinephase  
 ppm

以下に由来: Morita\_3010-1.jdf

Filename = Morita\_3010-3.jdf  
 Author = Administrator  
 Experiment = zg30  
 Sample\_Id = NM1061\_Fr7  
 Solvent = CHLOROFORM-D  
 Creation\_Time = 23-DEC-2022 14:14:19  
 Revision\_Time = 23-DEC-2022 14:15:47  
 Current\_Time = 23-DEC-2022 14:15:59

Comment = NM1061\_Fr7  
 Data\_Format = 1D COMPLEX  
 Dim\_Size = 32768  
 Dim\_Title = 1H  
 Dim\_Units = [ppm]  
 Dimensions = X  
 Spectrometer = BRUKER\_DMX\_NMR

Field\_Strength = 7.0492145[T] (300[MHz])  
 X\_Domain = 1H  
 X\_Freq = 300.13185343[MHz]  
 X\_Freq\_Flip = TRUE  
 X\_Offset = 1.85342561[kHz]  
 X\_Points = 32768  
 X\_Prescans = 2  
 X\_Sweep = 6.18811881[kHz]  
 Scans = 16

Temp\_Get = 294.56[K]  
 Filter\_Factor = 3232

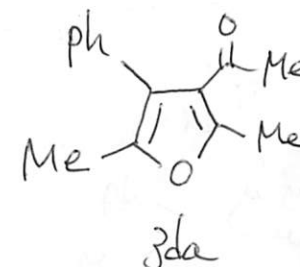

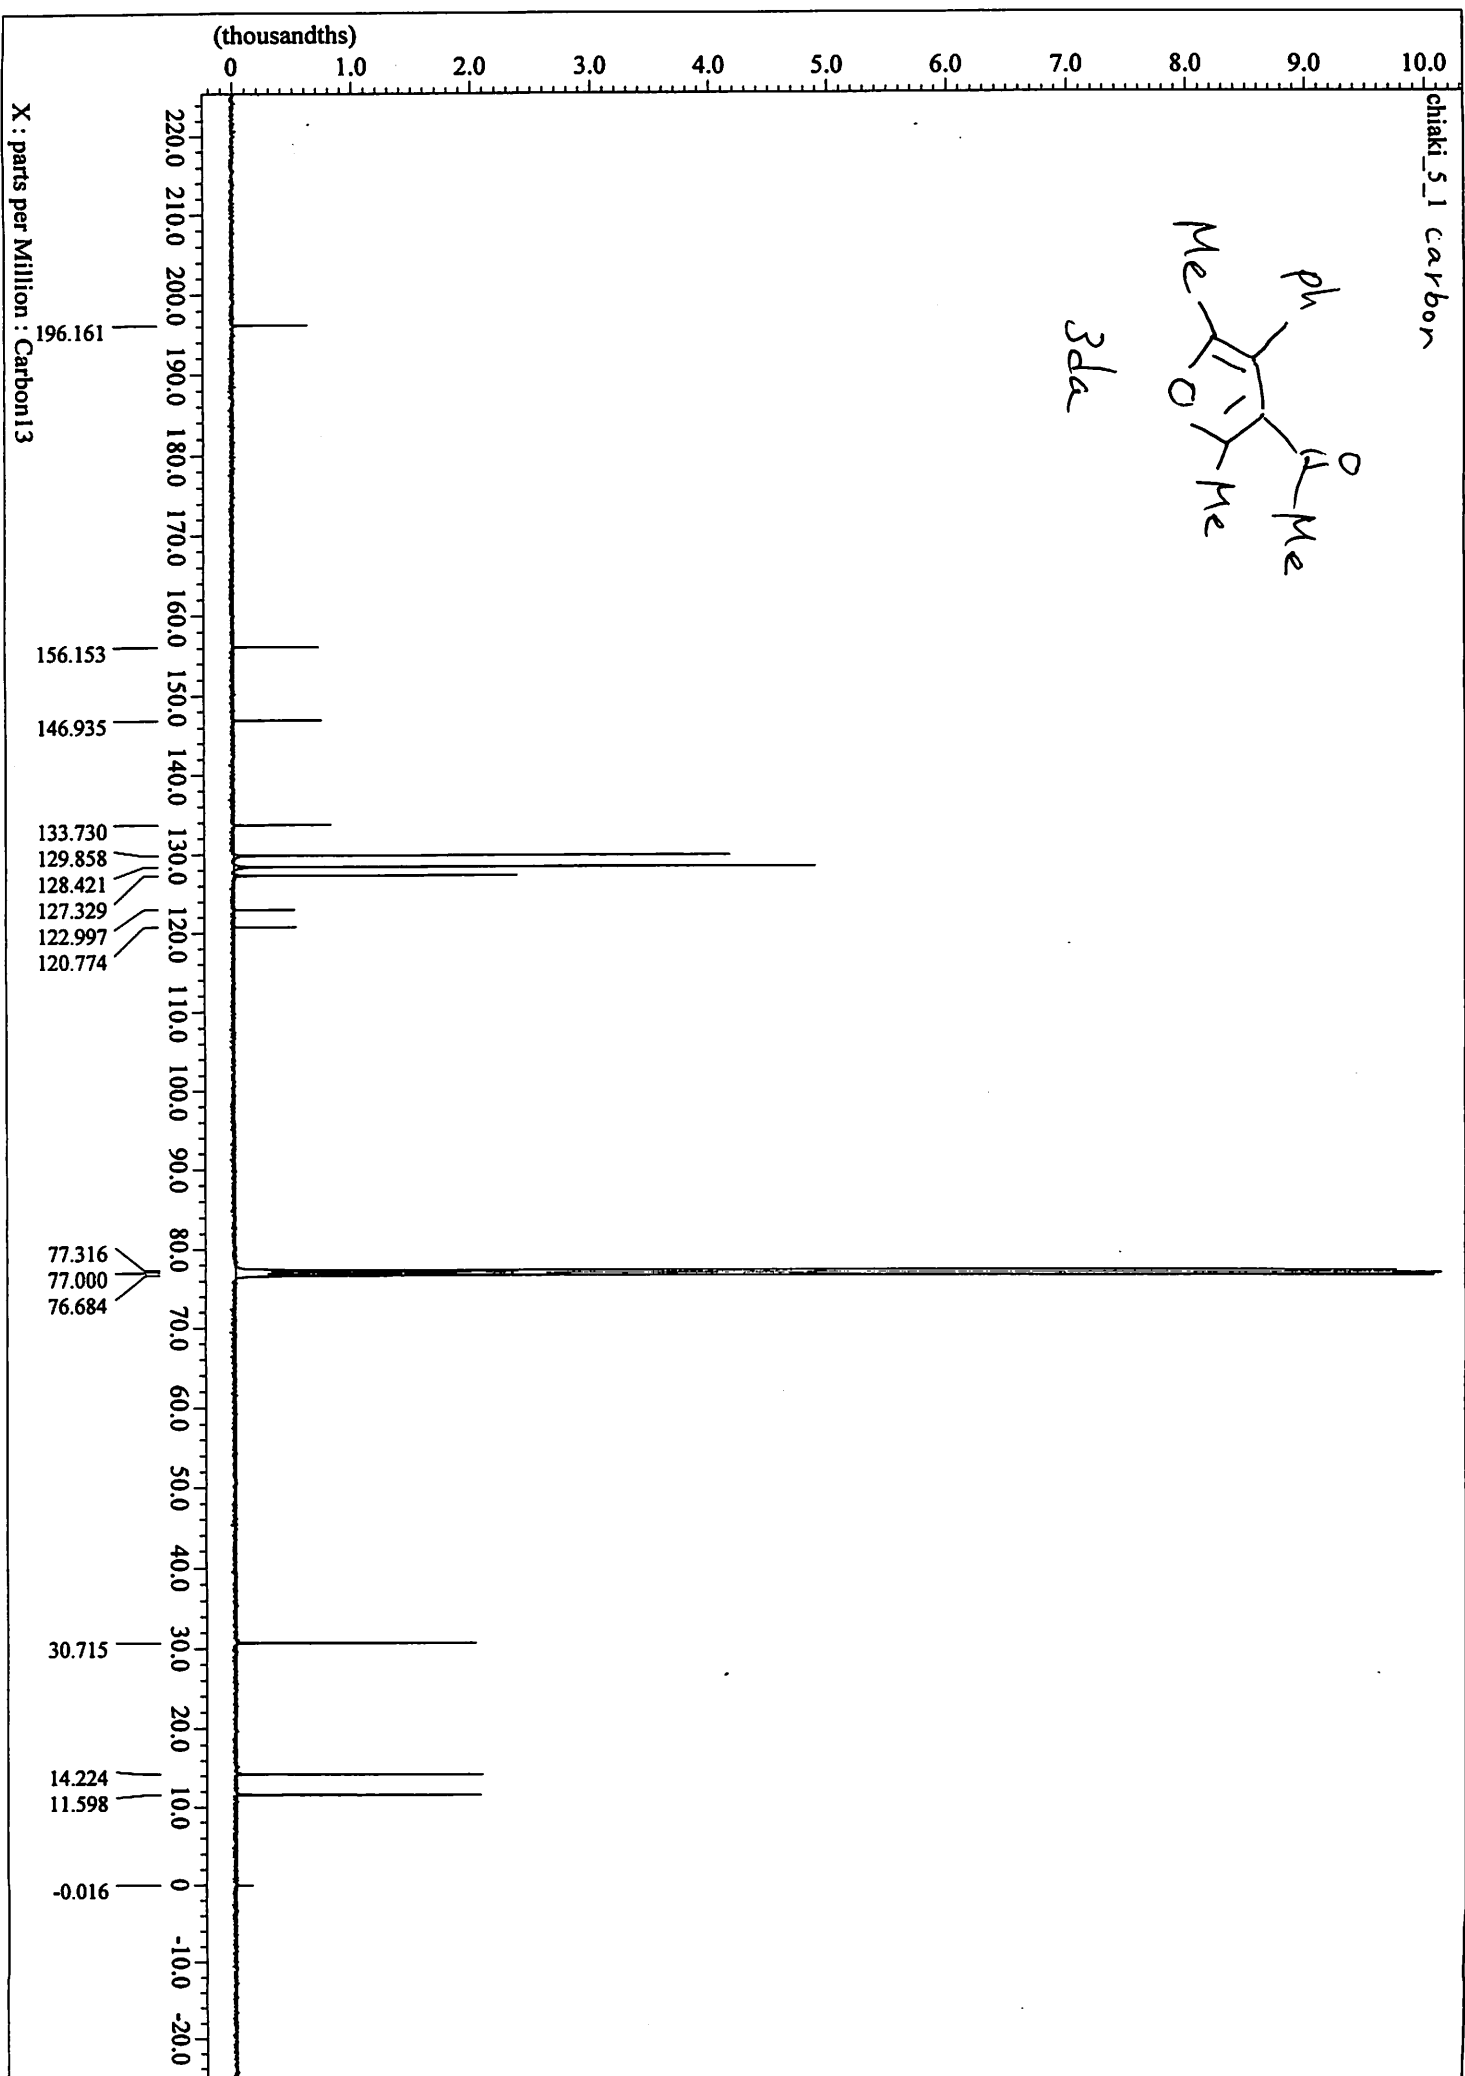

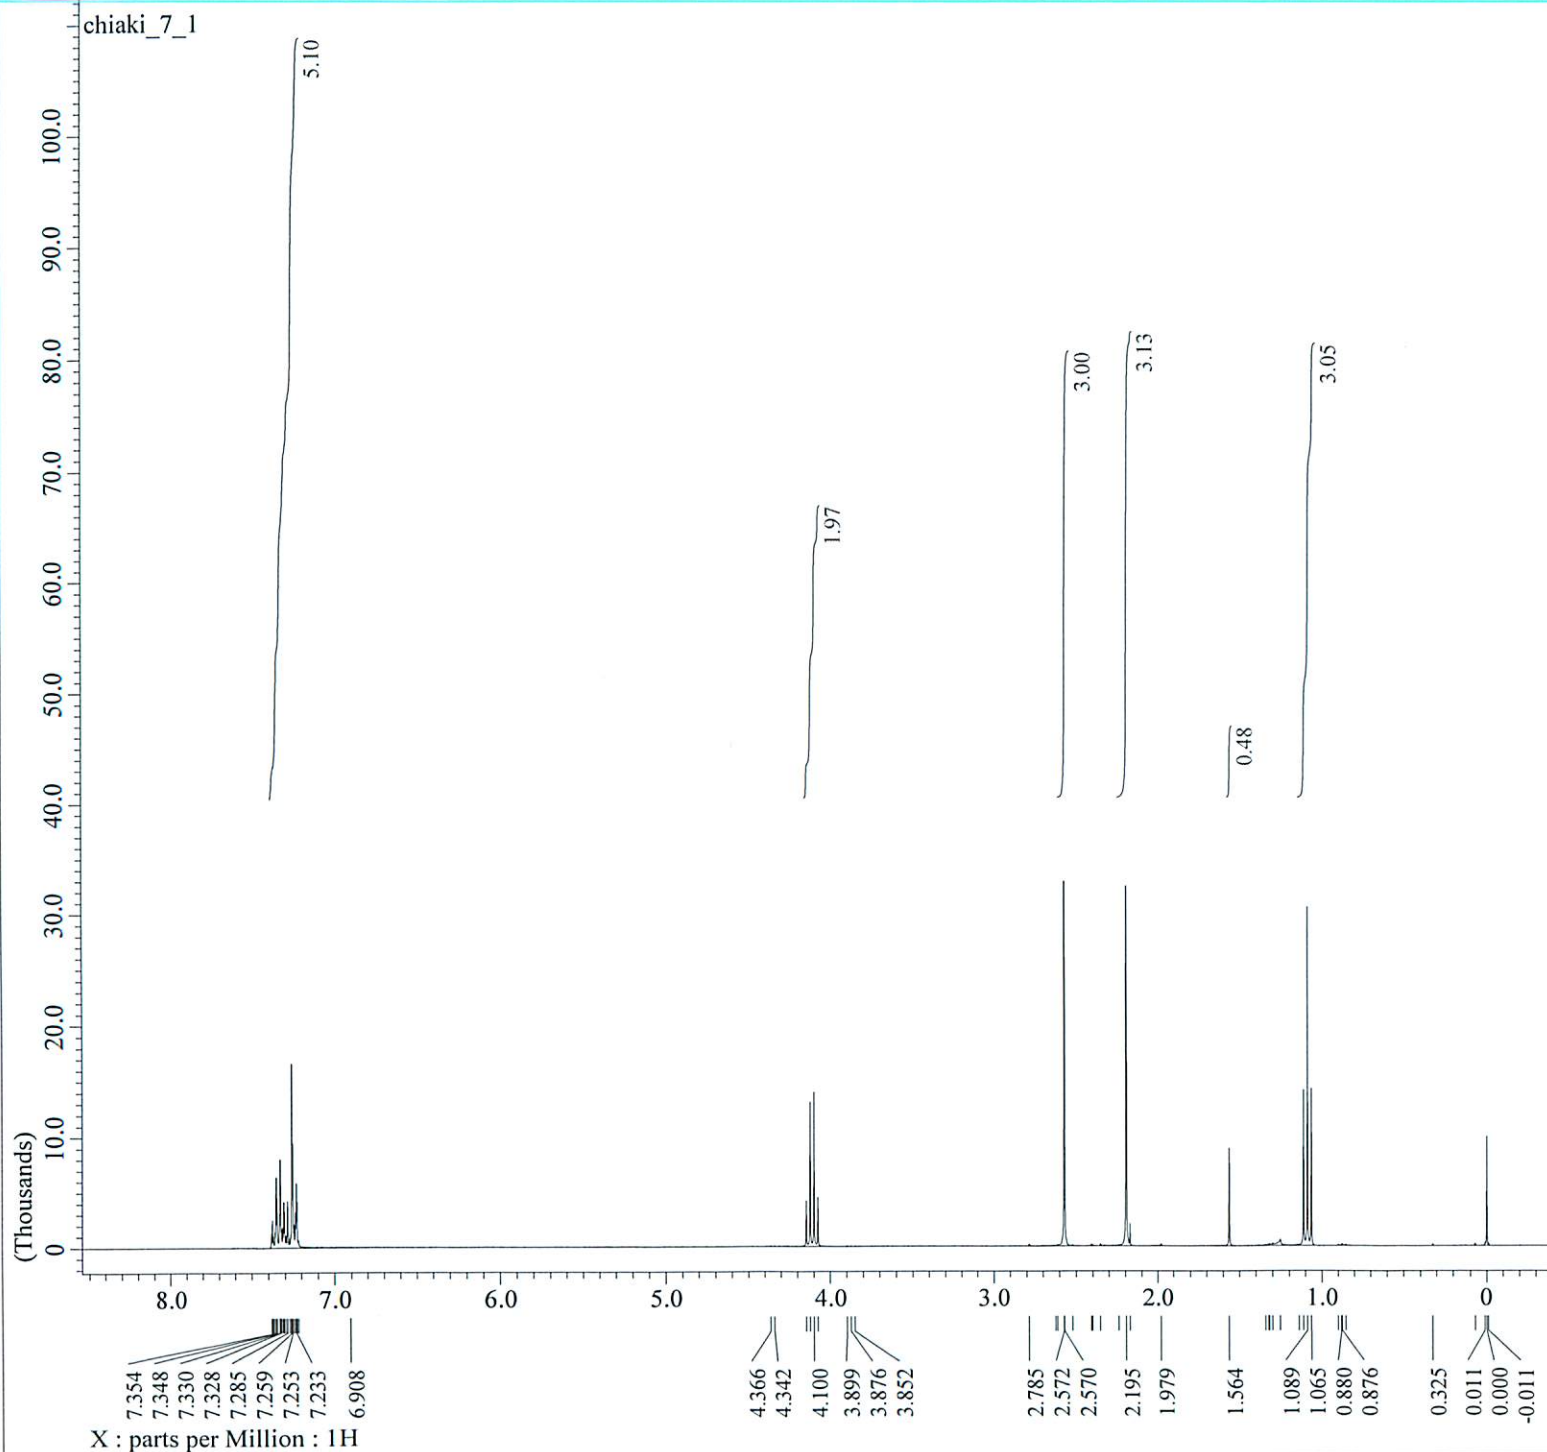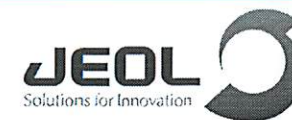

----- PROCESSING PARAMETERS -----  
 dc\_balance( 0, FALSE )  
 sexp( 0.2[Hz], 0.0[s] )  
 trapezoid( 0[%], 0[%], 80[%], 100[%] )  
 zerofill( 1 )  
 fft( 1, TRUE, TRUE )  
 machinephase  
 ppm

Filename = Y-18\_Kunugi\_1620-3.jdf  
 Author = Administrator  
 Experiment = zg30  
 Sample\_Id = chiaki\_7\_1  
 Solvent = CHLOROFORM-D  
 Creation\_Time = 8-FEB-2020 13:45:47  
 Revision\_Time = 13-FEB-2020 15:17:46  
 Current\_Time = 13-FEB-2020 15:18:02

Comment = chiaki\_7\_1  
 Data\_Format = 1D COMPLEX  
 Dim\_Size = 32768  
 Dim\_Title = 1H  
 Dim\_Units = [ppm]  
 Dimensions = X  
 Spectrometer = BRUKER DMX NMR

Field Strength = 7.0492145[T] (300[MHz])  
 X\_Domain = 1H  
 X\_Freq = 300.13185343[MHz]  
 X\_Freq\_Flip = TRUE  
 X\_Offset = 1.85342561[kHz]  
 X\_Points = 32768  
 X\_Prescans = 2  
 X\_Sweep = 6.18811881[kHz]  
 Scans = 16

Temp\_Get = 294.46[K]  
 Filter\_Factor = 3232

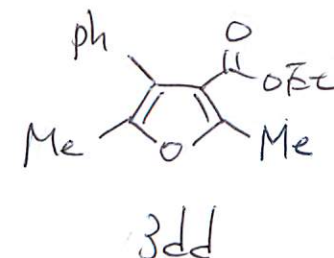

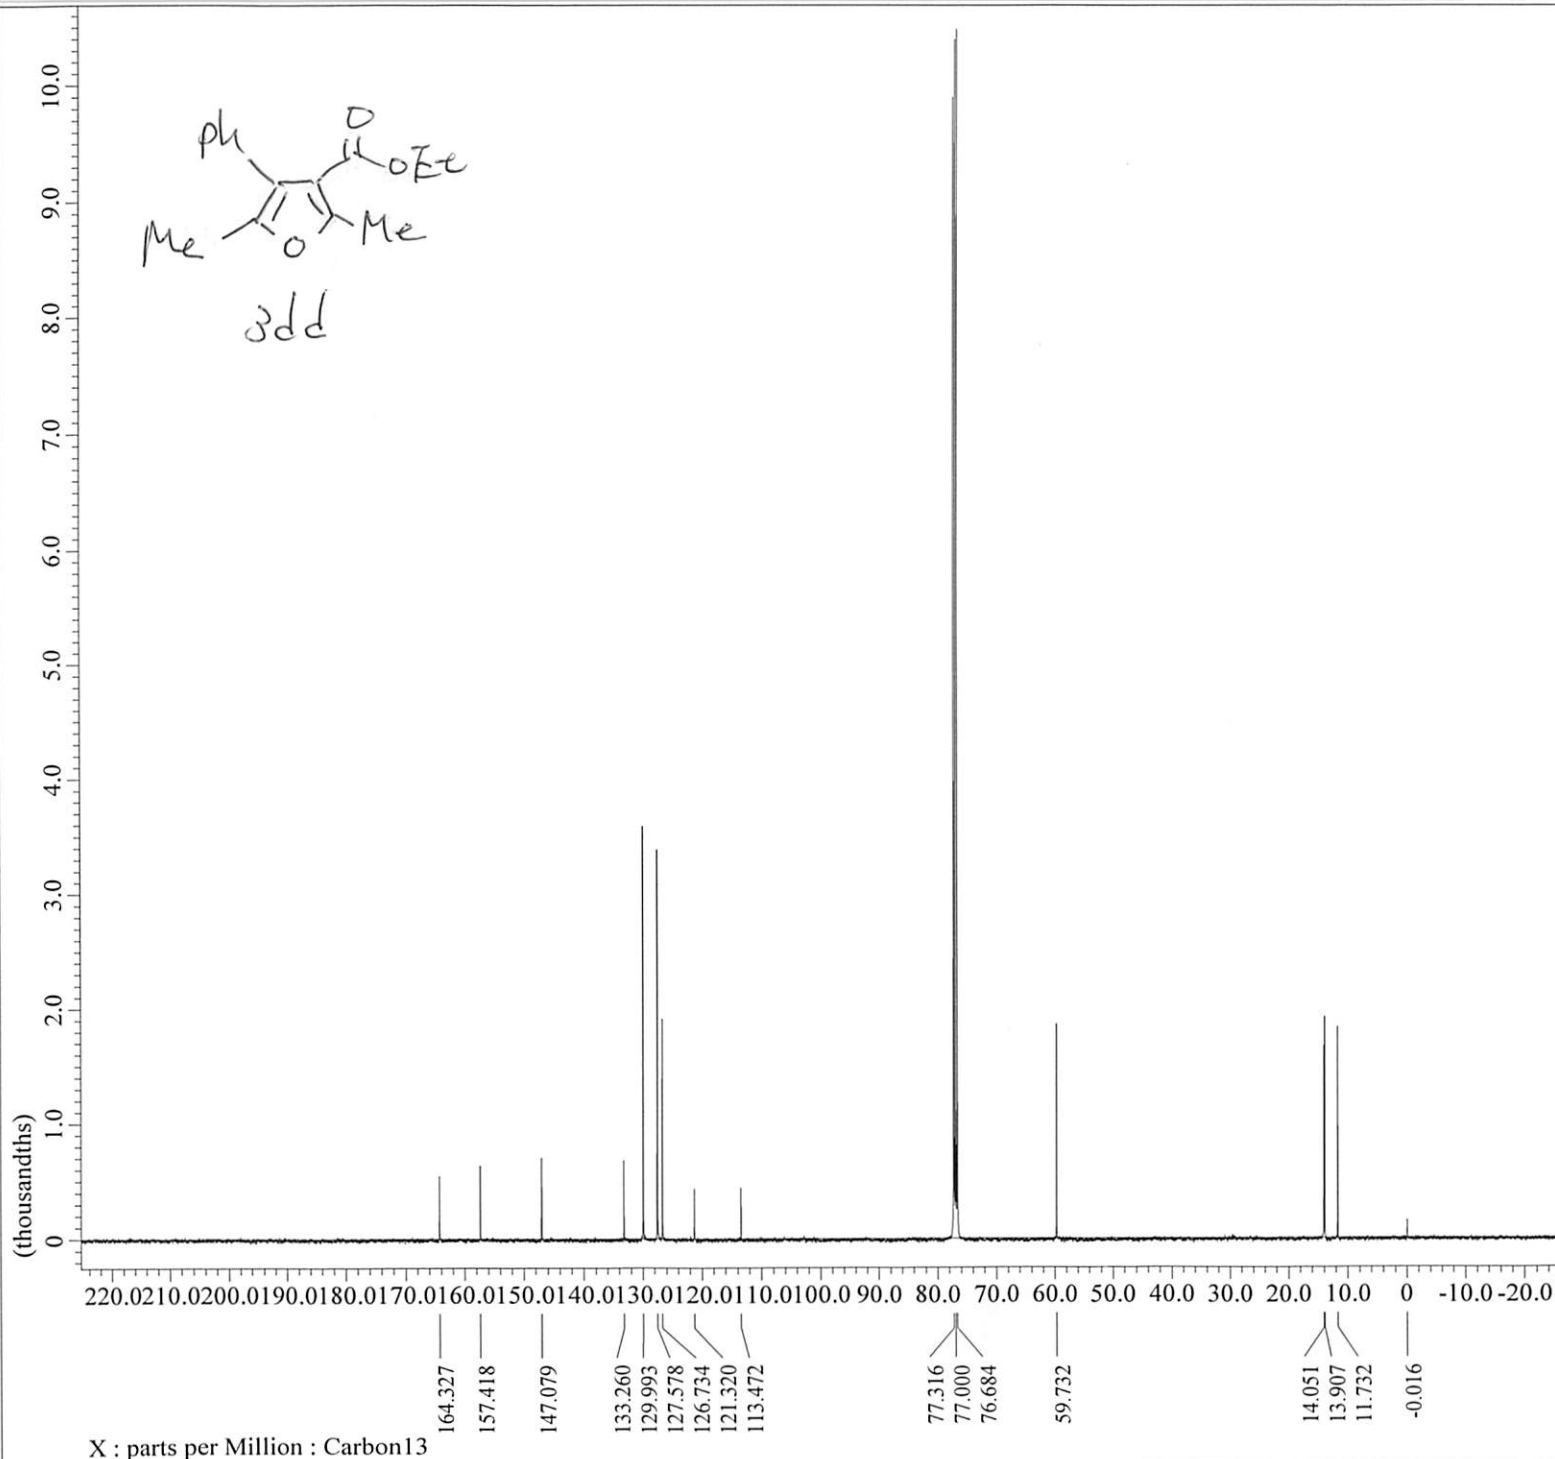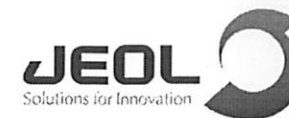

```

---- PROCESSING PARAMETERS ----
sexp( 2.0[Hz], 0.0[s] )
trapezoid( 0[%], 0[%], 80[%], 100[%] )
zerofill( 1 )
fft( 1, TRUE, TRUE )
machinephase
ppm

```

以下に由来: chiaki\_7\_1\_carbon-1-1.jdf

```

Filename      = chiaki_7_1_carbon-
Author        = delta
Experiment    = carbon.jxp
Sample_Id     = chiaki_7_1
Solvent       = CHLOROFORM-D
Creation_Time = 12-FEB-2020 21:02:
Revision_Time = 13-FEB-2020 15:08:
Current_Time  = 13-FEB-2020 15:09:

```

```

Comment       = HRD173 cd2cl2 p30
Data_Format   = 1D COMPLEX
Dim_Size      = 26214
Dim_Title     = Carbon13
Dim_Units     = [ppm]
Dimensions    = X
Spectrometer  = JNM-ECZ400S/L1

```

```

Field_Strength = 9.389766[T] (400[M]
X_Acq_Duration = 1.03809024[s]
X_Domain      = 13C
X_Freq        = 100.52530333[MHz]
X_Offset      = 100[ppm]
X_Points      = 32768
X_Prescans    = 4
X_Resolution  = 0.96330739[Hz]
X_Sweep       = 31.56565657[kHz]
X_Sweep_Clip  = 25.25252525[kHz]
Irr_Domain    = Proton
Irr_Freq      = 399.78219838[MHz]
Irr_Offset    = 5[ppm]
Blanking      = 5[us]
Clipped       = FALSE
Decimation_Reg = r: 198 ( 197 ), g: 39
Scans         = 8192
Total_Scans   = 8192

```

```

Relaxation_Delay = 2[s]
Recvr_Gain       = 50
Temp_Get         = 20.8[°C]
X_90_Width      = 9.7[us]
X_Acq_Time      = 1.03809024[s]
X_Angle         = 30[deg]
X_Atn           = 8.2[dB]
X_Pulse         = 3.23333333[us]
Irr_Atn_Dec     = 28.124[dB]
Irr_Atn_Dec_Calc = 28.124[dB]
Irr_Atn_Dec_Default_Calc = 28.124[dB]
Irr_Atn_Noise   = 28.124[dB]
Irr_Dec_Bandwidth_Hz = 4.7826087[kHz]
Irr_Dec_Bandwidth_Ppm = 11.96303566[ppm]

```

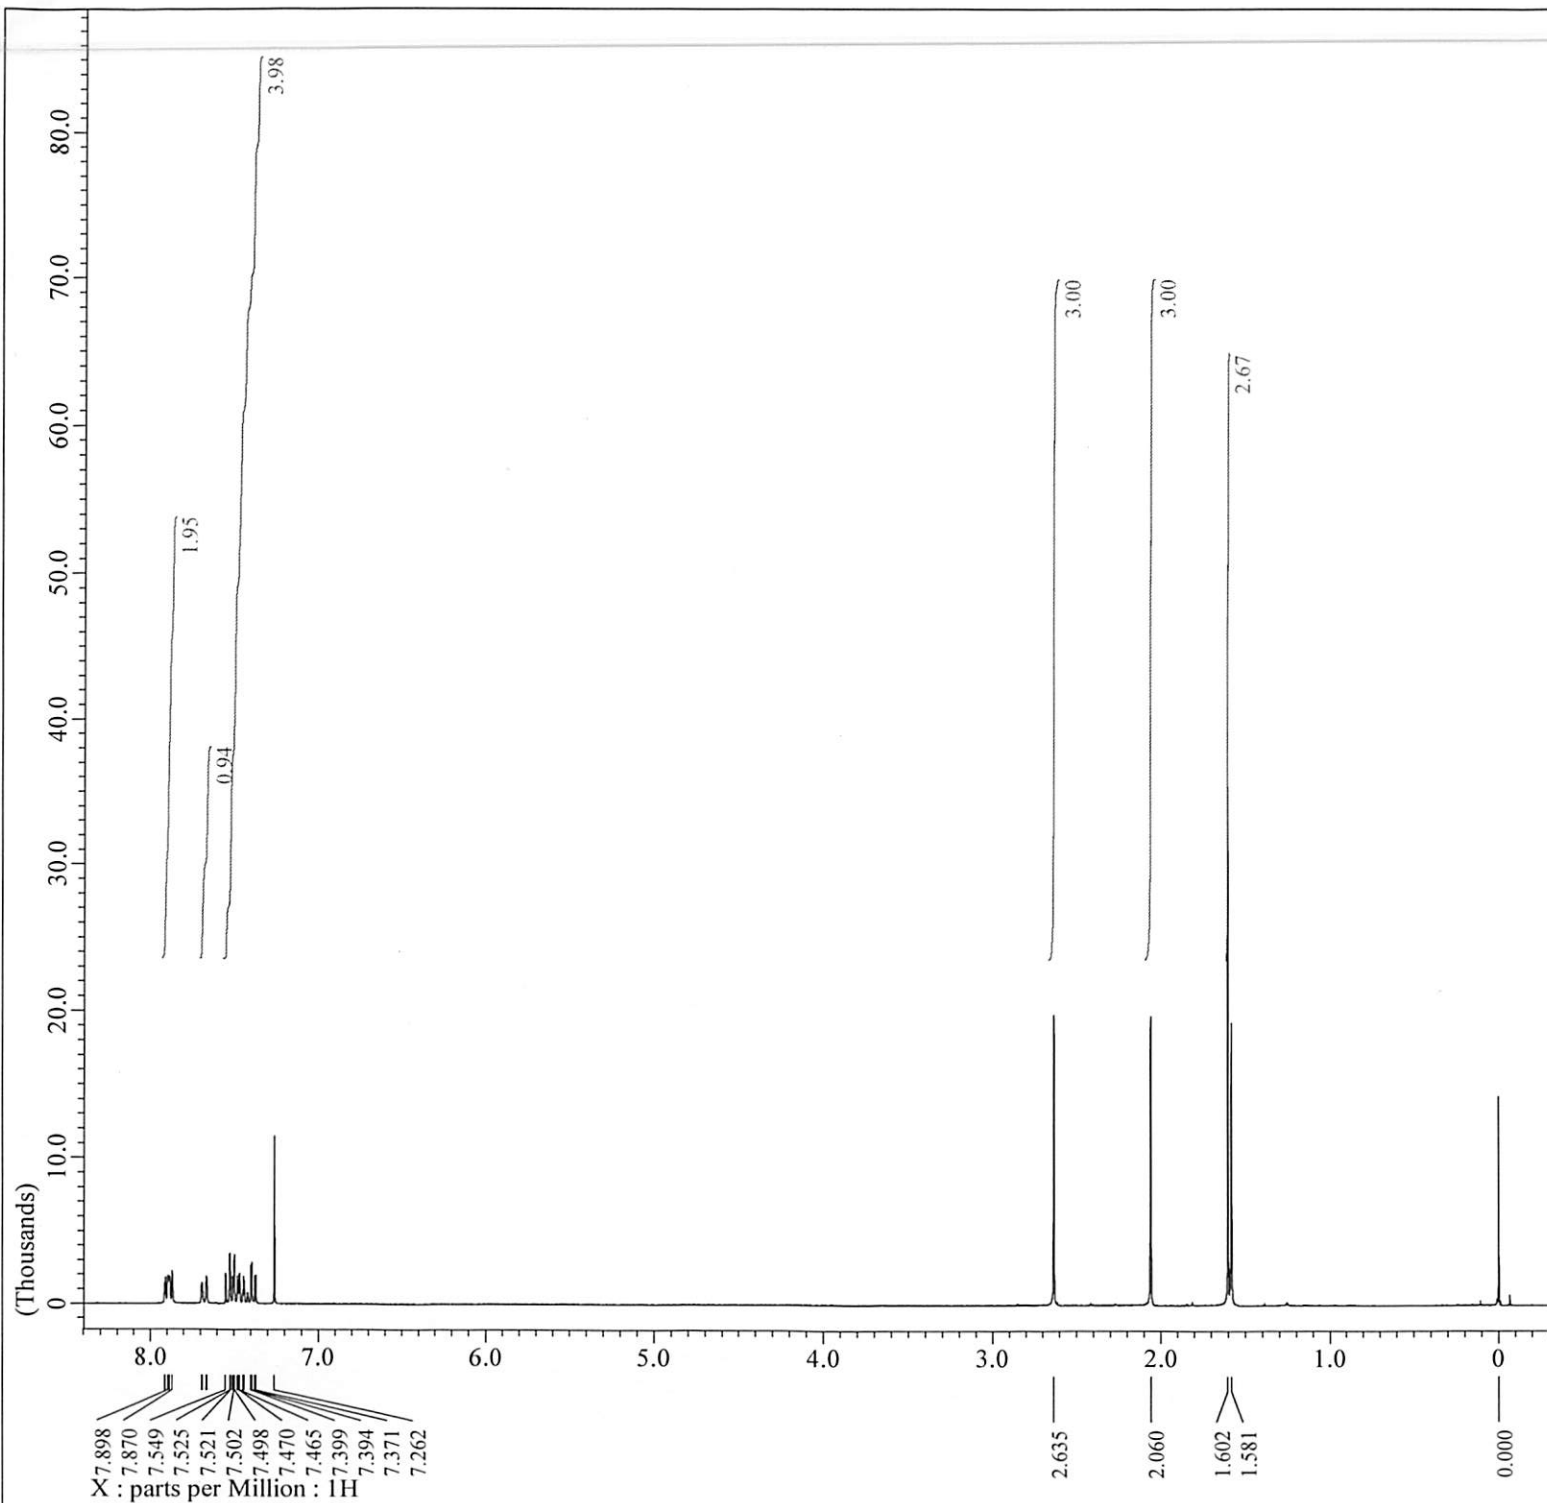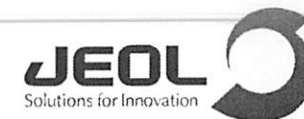

---- PROCESSING PARAMETERS ----  
 dc\_balance( 0, FALSE )  
 secp( 0.2[Hz], 0.0[s] )  
 trapezoid( 0[%], 0[%], 80[%], 100[%] )  
 zerofill( 1 )  
 fft( 1, TRUE, TRUE )  
 machinephase  
 ppm

以下に由来: Morita\_2830-1.jdf

Filename = Morita\_2830-7.jdf  
 Author = Administrator  
 Experiment = zg30  
 Sample\_Id = kt24-Fr10  
 Solvent = CHLOROFORM-D  
 Creation\_Time = 26-AUG-2022 17:25:28  
 Revision\_Time = 14-NOV-2023 18:48:49  
 Current\_Time = 14-NOV-2023 18:49:00

Comment = kt24-Fr10  
 Data Format = 1D COMPLEX  
 Dim\_Size = 32768  
 Dim\_Title = 1H  
 Dim\_Units = [ppm]  
 Dimensions = X  
 Spectrometer = BRUKER\_DMX\_NMR

Field\_Strength = 7.0492145[T] (300[MHz])  
 X\_Domain = 1H  
 X\_Freq = 300.13185343[MHz]  
 X\_Freq\_Flip = TRUE  
 X\_Offset = 1.85342561[kHz]  
 X\_Points = 32768  
 X\_Prescans = 2  
 X\_Sweep = 6.18811881[kHz]  
 Scans = 16

Temp\_Get = 294.76[K]  
 Filter\_Factor = 3232

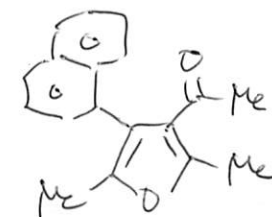

3ea

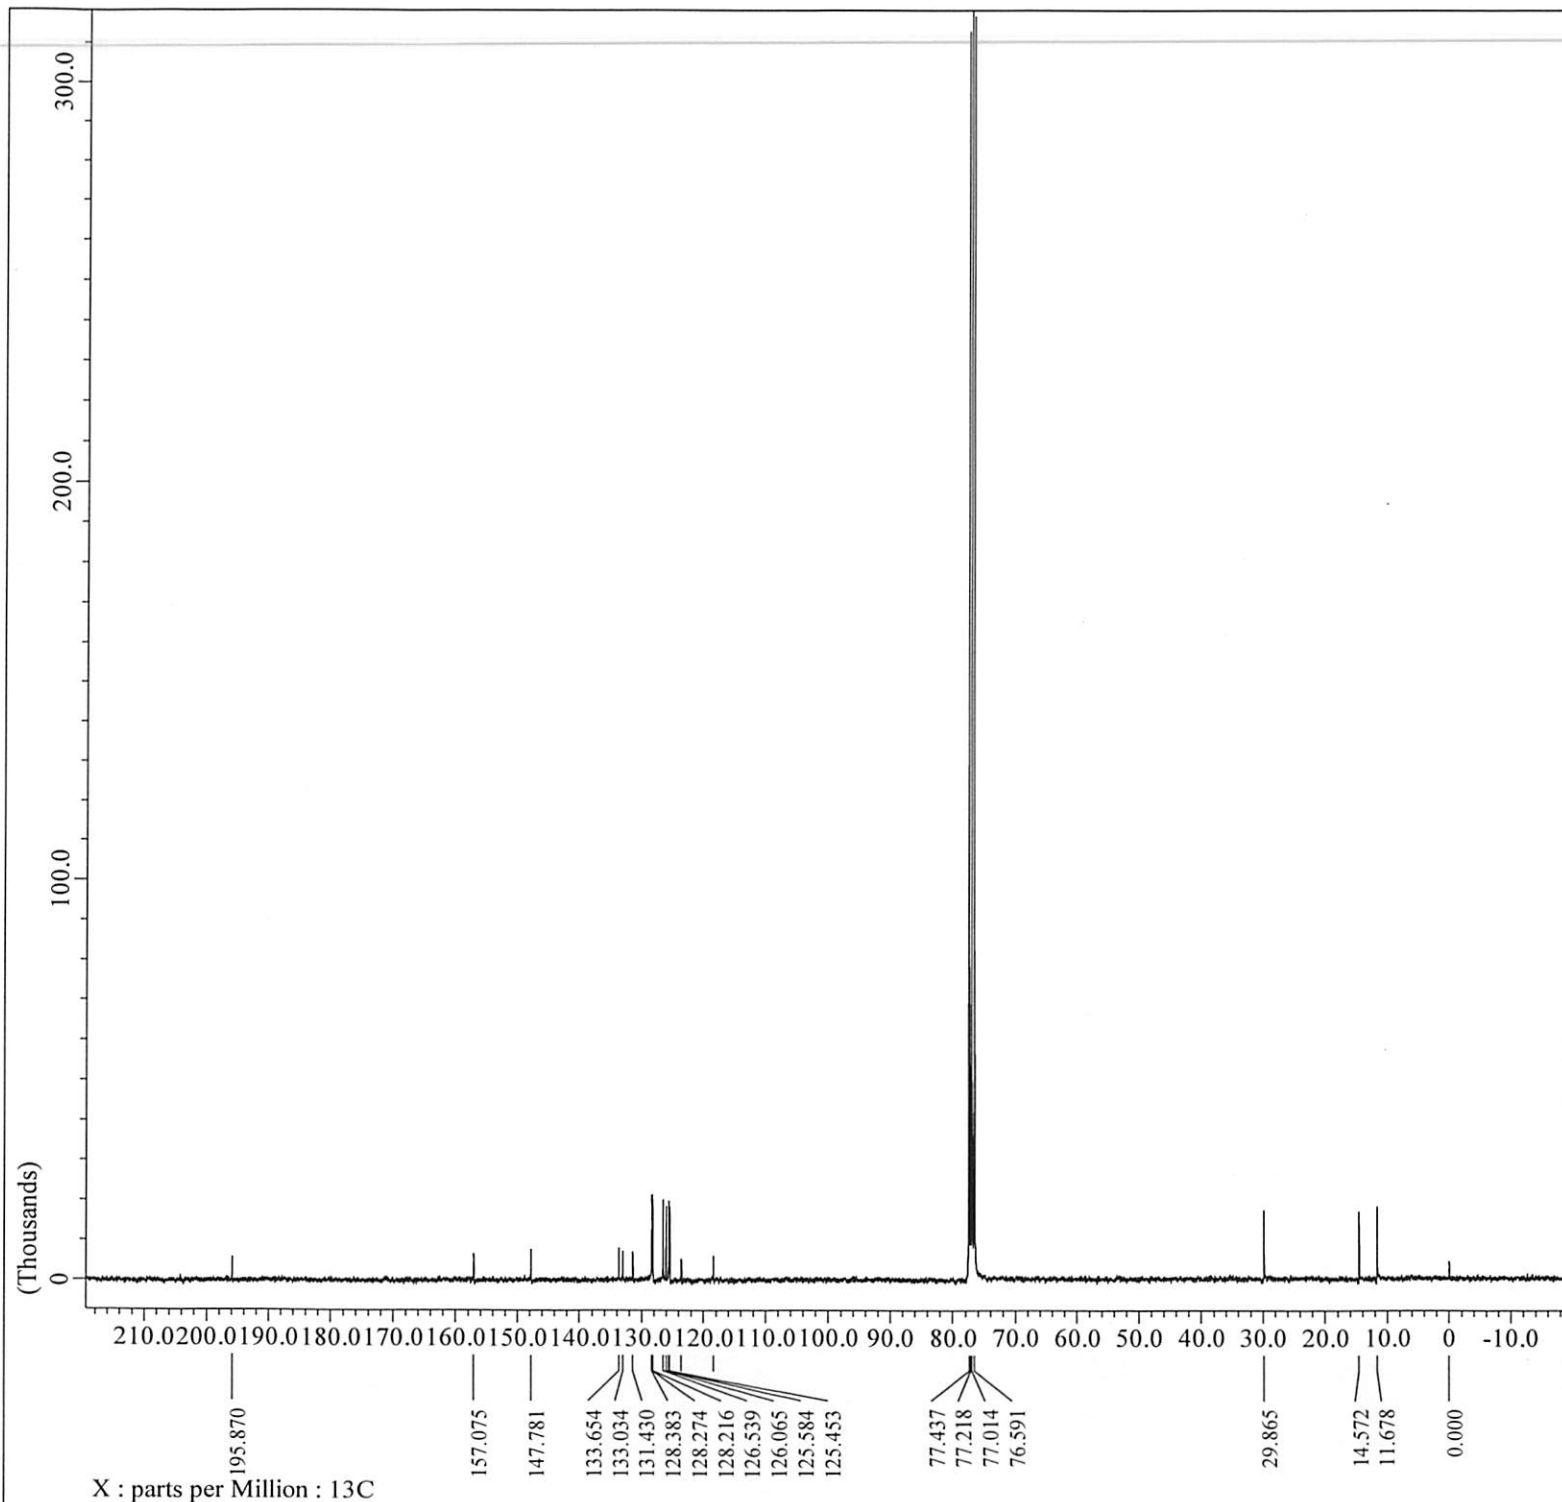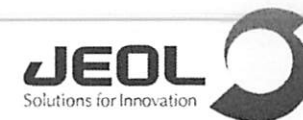

---- PROCESSING PARAMETERS ----  
dc\_balance( 0, FALSE )  
sext( 2.0[Hz], 0.0[s] )  
trapezoid( 0[%], 0[%], 80[%], 100[%] )  
zerofill( 1 )  
fft( 1, TRUE, TRUE )  
machinphase  
ppm  
phase( -5, -15, 50[%] )

以下に由来: Morita\_2850-1.jdf

Filename = Morita\_2850-4.jdf  
Author = Administrator  
Experiment = zgpg30  
Sample\_Id = KY24\_Fr10\_13CNMR  
Solvent = CHLOROFORM-D  
Creation\_Time = 26-AUG-2022 17:27:53  
Revision\_Time = 14-NOV-2023 18:53:40  
Current\_Time = 14-NOV-2023 18:53:56

Comment = KY24\_Fr10\_13CNMR  
Data Format = 1D COMPLEX  
Dim\_Size = 32768  
Dim\_Title = 13C  
Dim\_Units = [ppm]  
Dimensions = X  
Spectrometer = BRUKER\_DMX\_NMR

Field\_Strength = 7.0492145[T] (300[MHz])  
X\_Domain = 13C  
X\_Freq = 75.4752953[MHz]  
X\_Freq\_Flip = TRUE  
X\_Offset = 7.54630085[kHz]  
X\_Points = 32768  
X\_Prescans = 4  
X\_Sweep = 18.02884615[kHz]  
Scans = 10000

Temp\_Get = 296.86[K]  
Filter\_Factor = 1109

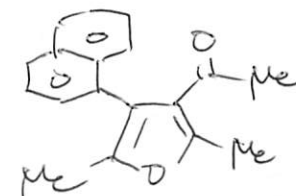

3ea

```

---- PROCESSING PARAMETERS ----
dc_balance ( 0, FALSE )
sexp ( 0.2[Hz], 0.0[ss] )
trapezoid ( 0[%], 0[%], 80[%], 100[%] )
zerofill ( 1 )
fft ( 1, TRUE, TRUE )
machinephase
ppm
phase ( 0, 15, 50[%] )
  
```

以下に由来: Morita\_2800-6.j4f

```

Filename      = Morita_2800-10.j4f
Author        = Administrator
Experiment    = zg30
Sample Id     = KT22-Fr8
Solvent       = CHLOROFORM-D
Creation Time  = 26-NOV-2022 17:17:10
Revision Time = 14-NOV-2023 18:31:26
Current Time  = 14-NOV-2023 18:31:47

Comment
Data Format   = ID COMPLEX
Dim Size     = 32768
Dim Title    = 1H
Dim Units    = [ppm]
Dimensions   = X
Spectrometer = BRUKER_DMX_NMR

Field Strength = 7.0492145[T] (300 [MHz])
X Domain      = 1H
X Freq        = 300.13185343[MHz]
X_Freq_Flip   = TRUE
X_Offset      = 1.85342561 [kHz]
X Points      = 32768
X_Prescans    = 2
X_Sweep       = 6.18811881 [kHz]
Scans         = 16

Temp_Get      = 294.86[K]
Filter_Factor = 3232
  
```

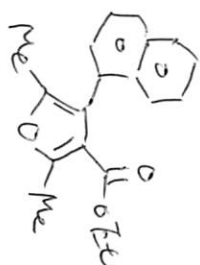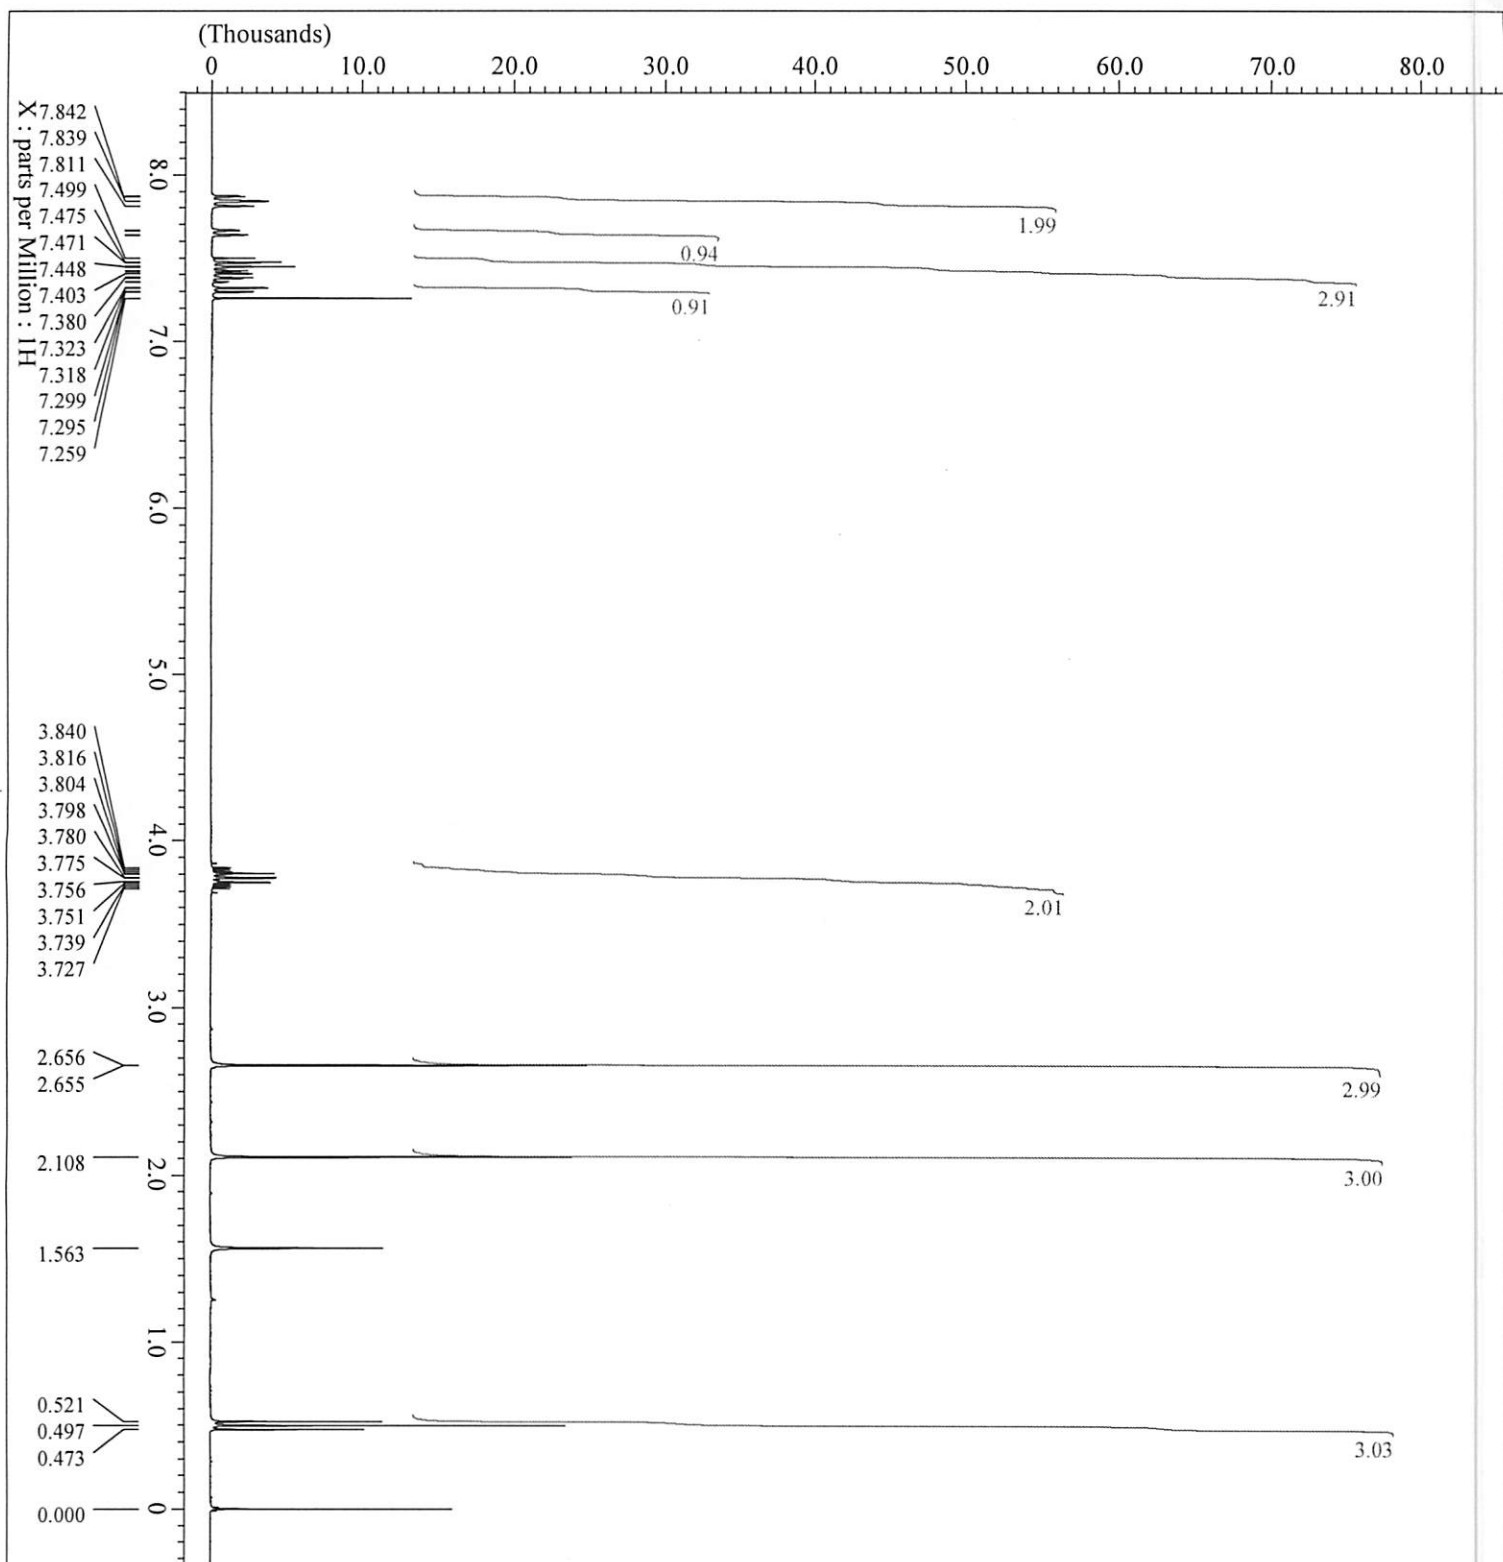

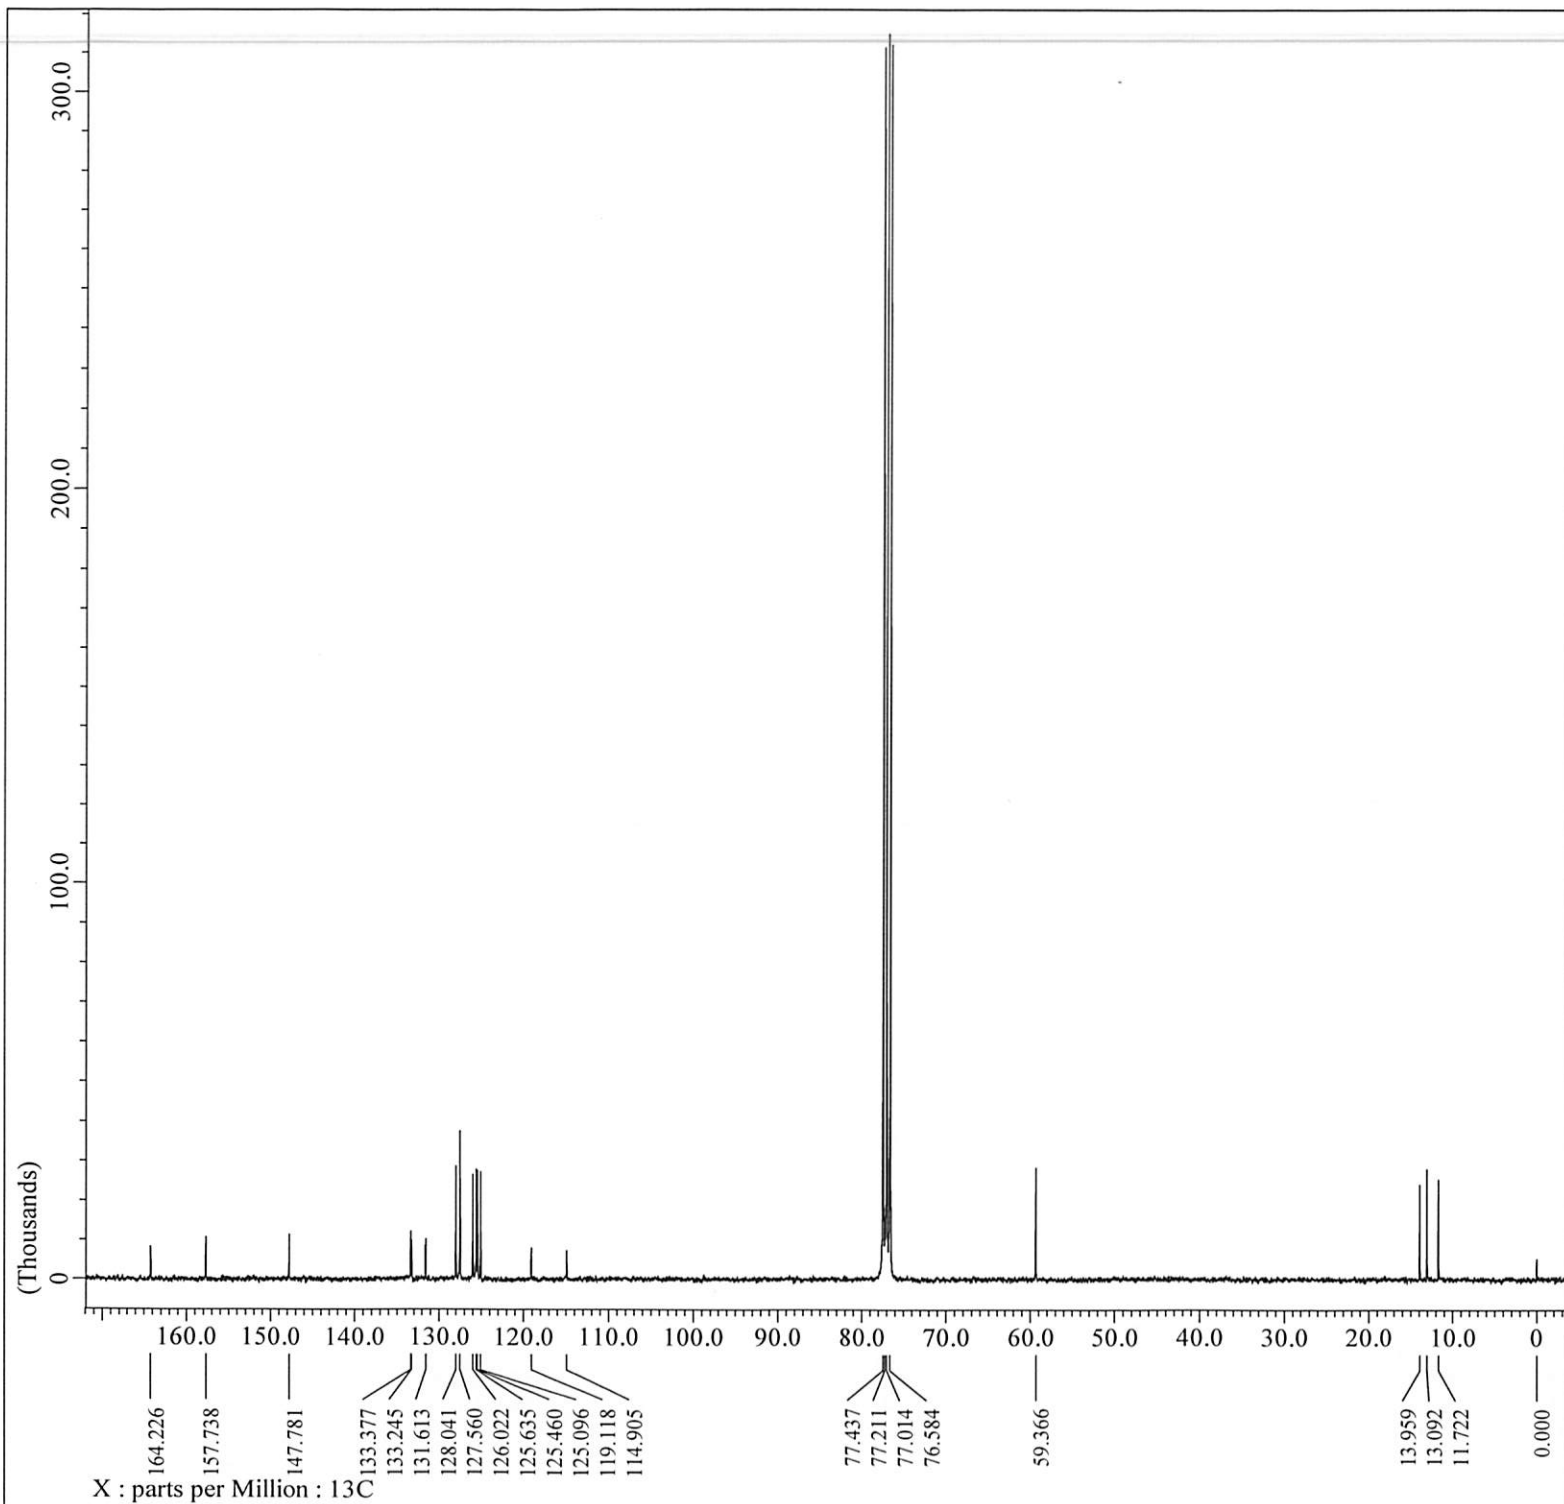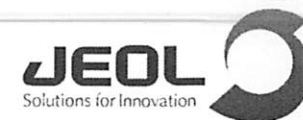

```

---- PROCESSING PARAMETERS ----
dc_balance( 0, FALSE )
sexf( 2.0[Hz], 0.0[s] )
trapezoid( 0[%], 0[%], 80[%], 100[%] )
zerofill( 1 )
fft( 1, TRUE, TRUE )
machinephase
ppm

```

以下に由来: Morita\_2820-4.jdf

```

Filename      = Morita_2820-6.jdf
Author        = Administrator
Experiment     = zgpg30
Sample_Id     = KT22_Fr8_13C
Solvent       = CHLOROFORM-D
Creation_Time  = 26-AUG-2022 17:23:40
Revision_Time = 14-NOV-2023 18:57:42
Current_Time  = 14-NOV-2023 18:57:59

```

```

Comment       = KT22_Fr8_13C
Data Format    = 1D COMPLEX
Dim_Size      = 32768
Dim_Title     = 13C
Dim_Units     = [ppm]
Dimensions    = X
Spectrometer  = BRUKER_DMX_NMR

```

```

Field_Strength = 7.0492145[T] (300[MHz])
X_Domain       = 13C
X_Freq         = 75.4752953[MHz]
X_Freq_Flip    = TRUE
X_Offset       = 7.54630085[kHz]
X_Points       = 32768
X_Prescans     = 4
X_Sweep        = 18.02884615[kHz]
Scans          = 10000

```

```

Temp_Get       = 296.86[K]
Filter_Factor  = 1109

```

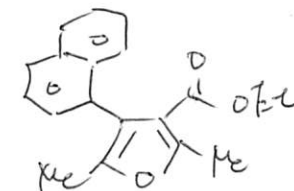

3ec



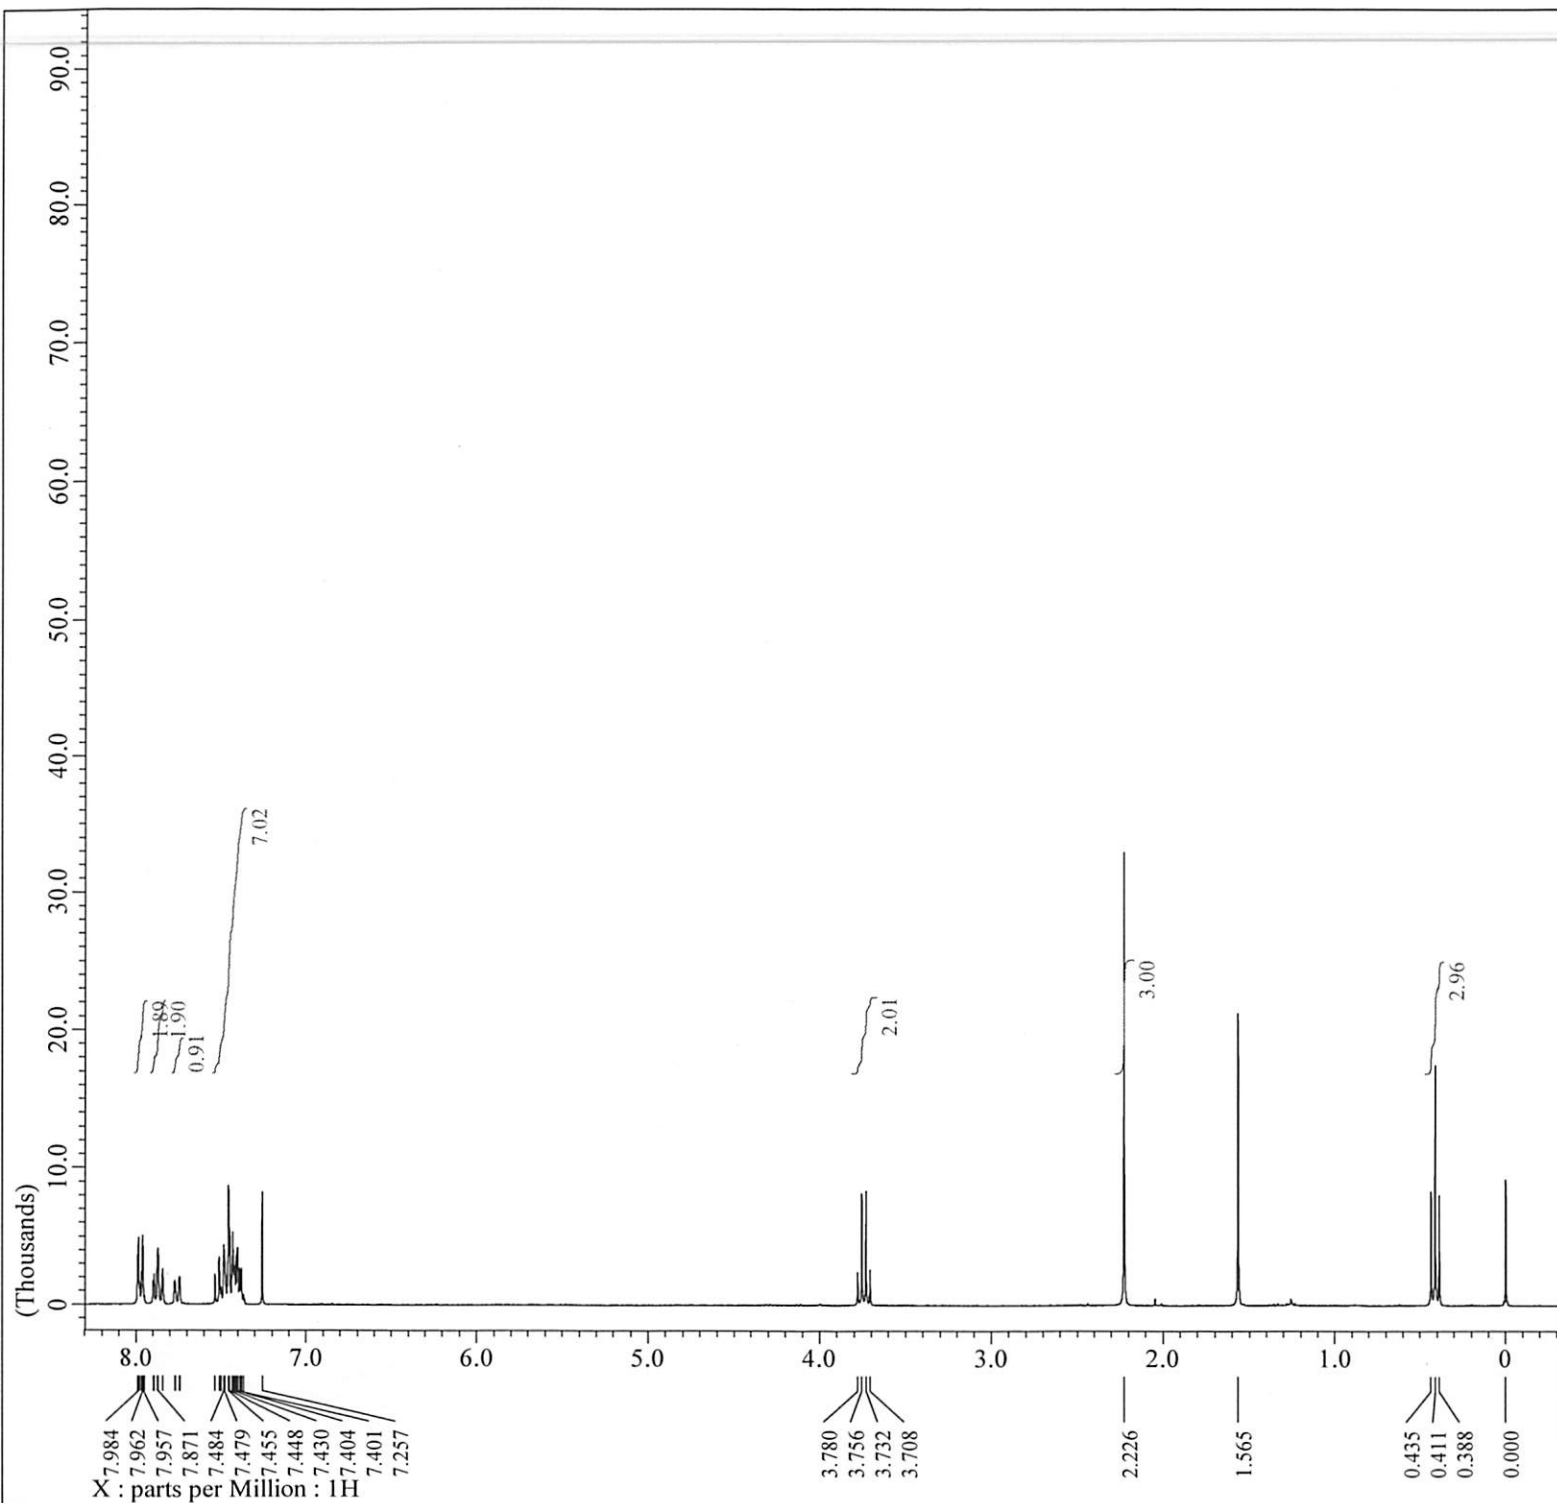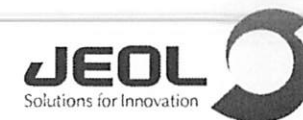

```

---- PROCESSING PARAMETERS ----
dc_balance( 0, FALSE )
sext( 0.2[Hz], 0.0[s] )
trapezoid( 0[%], 0[%], 80[%], 100[%] )
zerofill( 1 )
fft( 1, TRUE, TRUE )
machinephase
ppm

```

以下に由来: Morita\_2870-1.jdf

```

Filename      = Morita_2870-5.jdf
Author        = Administrator
Experiment     = zg30
Sample_Id     = Kt25-Fr7
Solvent       = CHLOROFORM-D
Creation_Time  = 26-AUG-2022 17:35:47
Revision_Time = 14-NOV-2023 18:41:09
Current_Time  = 14-NOV-2023 18:41:38

```

```

Comment       = Kt25-Fr7
Data Format    = 1D COMPLEX
Dim_Size      = 32768
Dim_Title     = 1H
Dim_Units     = [ppm]
Dimensions    = X
Spectrometer  = BRUKER_DMX_NMR

```

```

Field_Strength = 7.0492145[T] (300[MHz])
X_Domain       = 1H
X_Freq         = 300.13185343[MHz]
X_Freq_Flip    = TRUE
X_Offset       = 1.85342561[kHz]
X_Points       = 32768
X_Prescans     = 2
X_Sweep        = 6.18811881[kHz]
Scans          = 16

```

```

Temp_Get       = 294.86[K]
Filter_Factor  = 3232

```

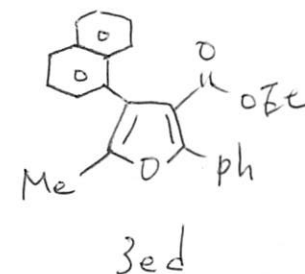

---- PROCESSING PARAMETERS ----  
 dc\_balance ( 0, FALSE )  
 secp ( 2.0[Hz], 0.0[s] )  
 trapezoid ( 0[%], 0[%], 80[%], 100[%] )  
 zerofill ( 1 )  
 fft ( 1, TRUE, TRUE )  
 machinephase  
 ppm

以下に由来: Morita\_2880-1.j4d

Filename = Morita\_2880-2.j4d  
 Author = Administrator  
 Experiment = zgpg30  
 Sample Id = KT25\_f7-13CNR  
 Solvent = CHLOROFORM-D  
 Creation Time = 29-AUG-2022 11:55:29  
 Revision Time = 29-AUG-2022 11:55:37  
 Current Time = 29-AUG-2022 11:56:05

Comment = KT25\_f7-13CNR  
 Data Format = ID COMPLEX  
 Dim Size = 32768  
 Dim Title = 13C  
 Dim Units = [ppm]  
 Dimensions = X  
 Spectrometer = BRUKER\_DMX\_NMR

Field Strength = 7.0492145[T] (300[MHz])  
 X Domain = 13C  
 X\_Freq = 75.4752953[MHz]  
 X\_Freq\_Flip = TRUE  
 X\_Offset = 7.54630085[KHz]  
 X Points = 32768  
 X\_Prescans = 4  
 X\_Sweep = 18.02884615[KHz]  
 Scans = 10000

Temp\_Get = 296.96[K]  
 Filter\_Factor = 1109

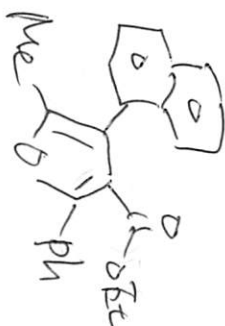

3cd

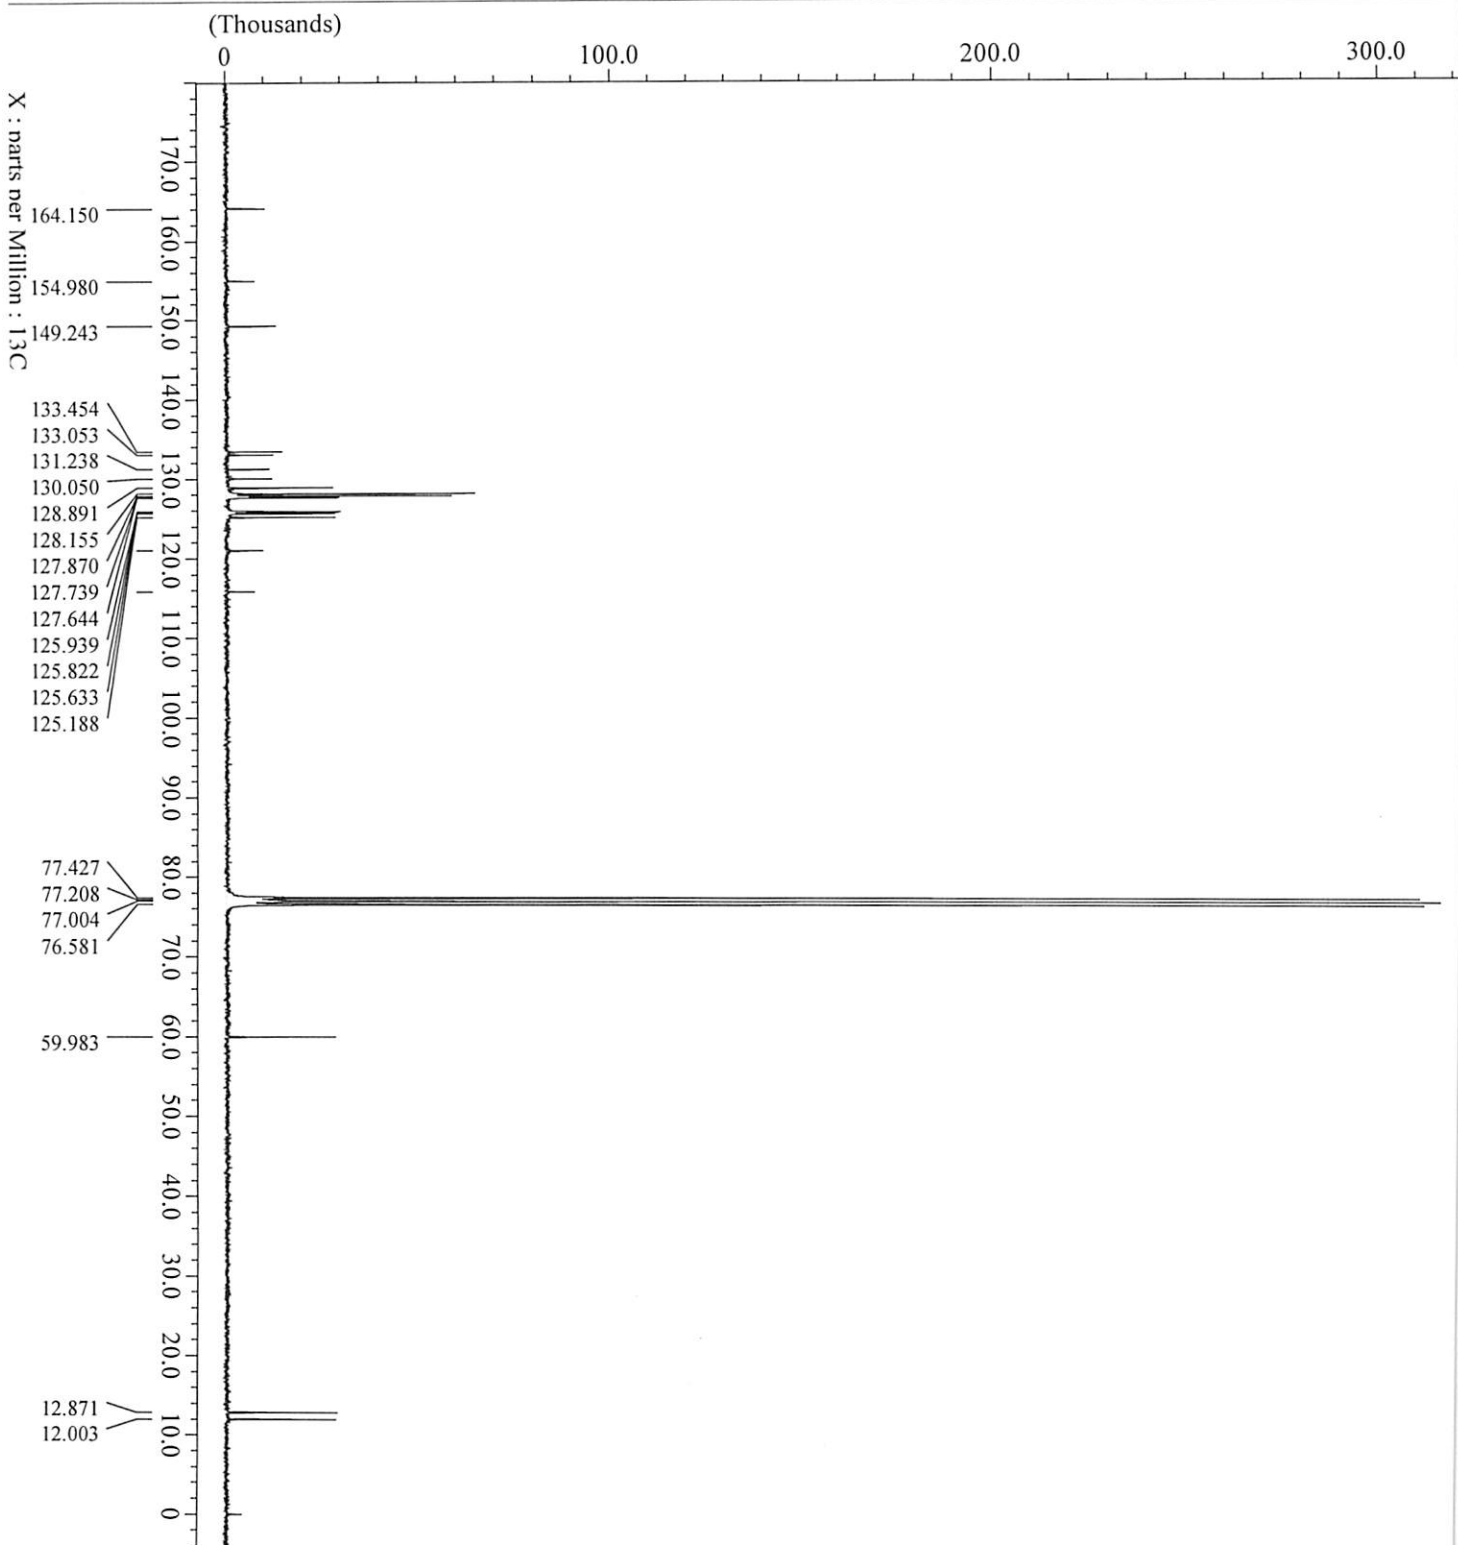

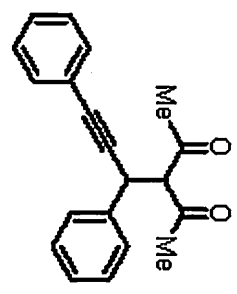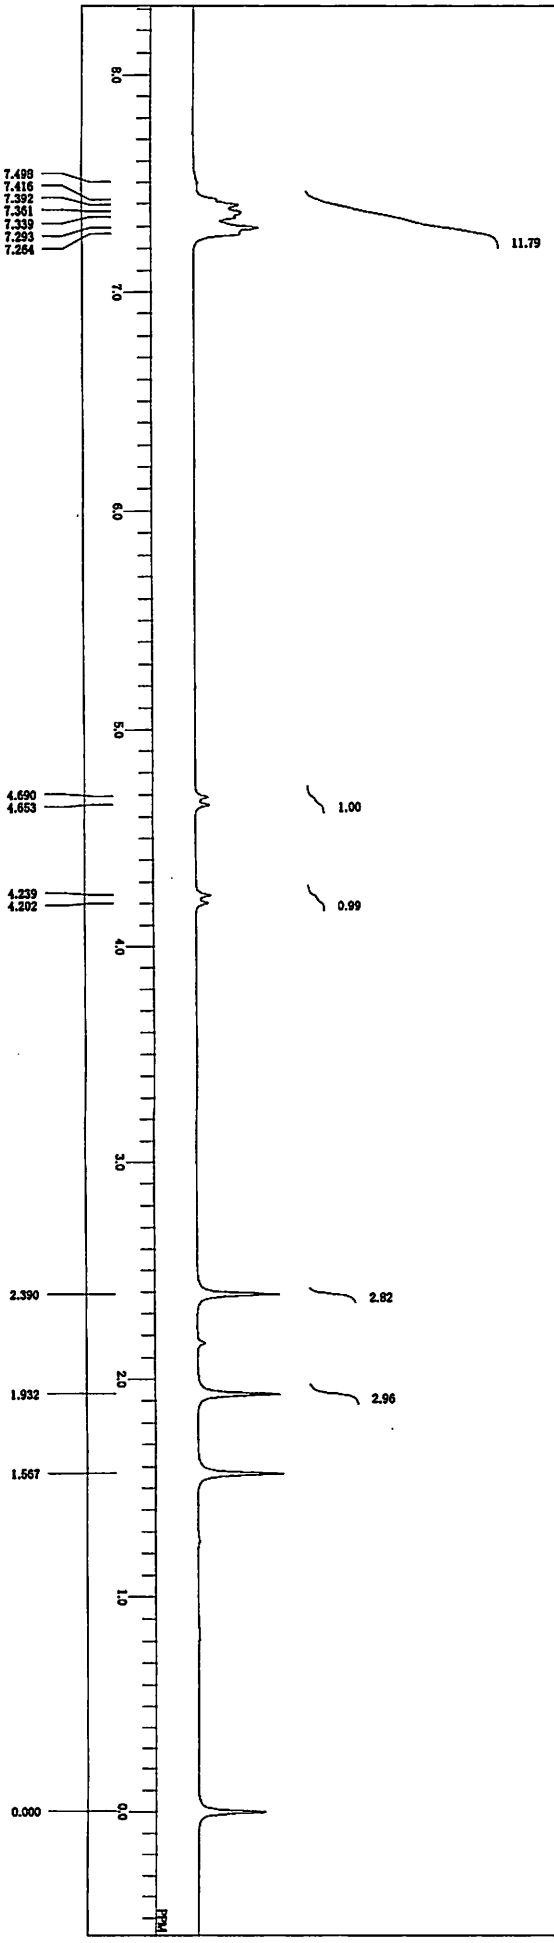

FILE 161220NM625NON.HL  
 COUNT 161220NM625  
 DATE Tue Dec 20 20:52:23 2016  
 DIR C:\NMR  
 OBSERV 130.00 MHz  
 PULPROG zgpg30  
 F2 100.62 MHz  
 SCANS 8  
 ACQTIME 2.7279 sec  
 FID 1  
 FIDRES 4.2720 sec  
 INLOC 6.00 sec  
 CTBAP 21.1 e  
 SOLVENT CHCL3  
 EXPT 0.00 ppm  
 B1 4.00 Hz  
 RNAME 21

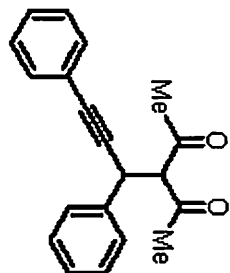

3/aa

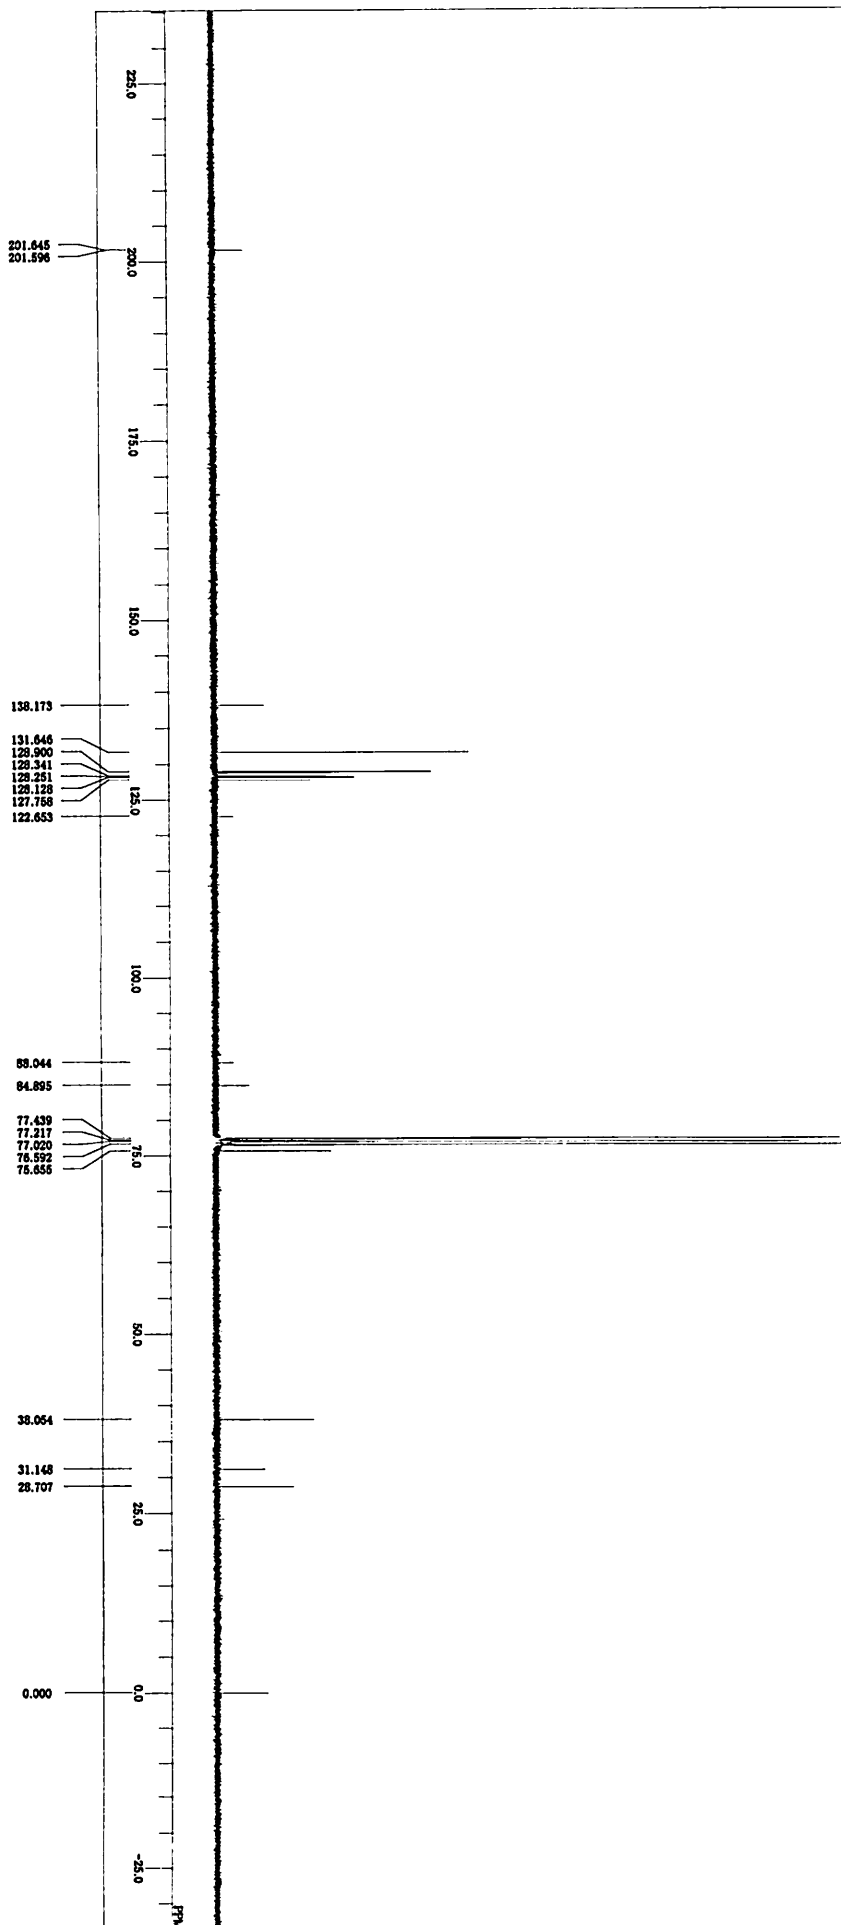

DPFILE 161221NM5251BCM.B1.d4  
 COUNT 720  
 DATE 22 Dec 22 05:42:38 2016  
 ORIGIN 161221NM525  
 EXAMOD 161221NM525  
 ORIGIN 161221NM525  
 POINT 32758  
 FREQU 20356.23 Hz  
 SCANS 16000  
 PD 1.3900 sec  
 PUL 5.10 usec  
 INTRUC 1H  
 CHCL3 21.0 c  
 EXREF 0.00 ppm  
 BF 0.12 Hz  
 RGAIN 25
